1 **Genomics of Natural Populations: Evolutionary Forces that Establish and Maintain Gene**  
2 **Arrangements in *Drosophila pseudoobscura***

3 Zachary L. Fuller<sup>\*,1</sup>, Gwilym D. Haynes<sup>\*,2</sup>, Stephen Richards<sup>†</sup>, and Stephen W. Schaeffer<sup>\*</sup>

4

5 \*Department of Biology, The Pennsylvania State University, 208 Erwin W. Mueller  
6 Laboratory, University Park, PA 16802-5301

7 † Human Genome Sequencing Center, Baylor College of Medicine, One Baylor Plaza,  
8 Houston TX 77030 Current Address:

9 1. Current address: 606 Fairchild Center, Department of Biological Sciences, Columbia  
10 University, New York, NY 10027

11 2. Current address: BC Cancer Agency, 675 W. 10<sup>th</sup> Avenue, Vancouver, BC V5Z 1L3

12 **Key Words:** *Drosophila*, Chromosomal Inversions, Population Genomics, Recombination,  
13 Linkage Disequilibrium

14 Corresponding Author: Zachary L. Fuller

15 606 Fairchild Center

16 Department of Biological Sciences

17 Columbia University,

18 New York, NY 10027

19 Telephone: (212) 854-4581

20 Email: [zlf2101@columbia.edu](mailto:zlf2101@columbia.edu)

21 **Running Title:** Population Genomics of Inversions

22

23 **Abstract**

24 The evolution of complex traits in heterogeneous environments may shape the order of genes  
25 within chromosomes. *Drosophila pseudoobscura* has a rich gene arrangement polymorphism  
26 that allows one to test evolutionary genetic hypotheses about how chromosomal inversions are  
27 established in populations. *D. pseudoobscura* has >30 gene arrangements on a single  
28 chromosome that were generated through a series of overlapping inversion mutations with > 10  
29 inversions with appreciable frequencies and wide geographic distributions. This study analyzes  
30 the genomic sequences of 54 strains of *Drosophila pseudoobscura* that carry one of six different  
31 chromosomal arrangements to test whether (1) genetic drift, (2) hitchhiking with an adaptive  
32 allele, (3) direct effects of inversions to create gene disruptions caused by breakpoints, or (4)  
33 indirect effects of inversions in limiting the formation of recombinant gametes are responsible  
34 for the establishment of new gene arrangements. We found that the inversion events do not  
35 disrupt the structure of protein coding genes at the breakpoints. Population genetic analyses of  
36 2,669 protein coding genes identified 277 outlier loci harboring elevated frequencies of  
37 arrangement-specific derived alleles. Significant linkage disequilibrium occurs among distant  
38 loci interspersed between regions with low levels of association indicating that distant allelic  
39 combinations are held together despite shared polymorphism among arrangements. Outlier genes  
40 showing evidence of genetic differentiation between arrangements are enriched for sensory  
41 perception and detoxification genes. The data presented here support the indirect effect of  
42 inversion hypothesis where chromosomal inversions are favored because they maintain linked  
43 associations among multi-locus allelic combinations among different arrangements.

44

## 45 **Introduction**

46 Chromosome structure and genome organization have been fluid over evolutionary  
47 history. An important force that may shape how genes are distributed across the genome and  
48 their order on chromosomes may be the evolution of complex traits. For single loci, natural  
49 selection is more efficient and effective in the presence of recombination because beneficial  
50 mutations can be dissociated from linked deleterious alleles (Becks & Agrawal, 2010, 2012;  
51 McDonald, Rice, & Desai, 2016; Otto & Lenormand, 2002) On the other hand, for traits  
52 controlled by multiple loci, recombination can break apart favorable combinations of alleles just  
53 as easily as it can bring them together. Therefore, the architecture of the genome may be shaped  
54 by mechanisms that modulate recombination rates such as fusing chromosomes together  
55 (Dobigny, Britton-Davidian, & Robinson, 2015; McAllister, Sheeley, Mena, Evans, &  
56 Schlotterer, 2008) or generating karyotypic variation among closely related species (Carbone et  
57 al., 2014; Nachman, Boyer, Searle, & Aquadro, 1994; O'Neill, Eldridge, & Metcalfe, 2004;  
58 O'Neill et al., 1999).

59 Genes within chromosome can be shuffled through meiotic recombination, which can be  
60 reduced by the presence of chromosomal inversions (Sturtevant, 1926). Inversions reduce  
61 recombination in rearrangement heterozygotes because unbalanced gametes form as a result  
62 crossing over within the inverted segments. In humans, inversions are discovered in patients  
63 with disease symptoms and are found to have chromosomal breaks in vital genes (Pettenati et al.,  
64 1995). With the advent of genomic sequencing, non-disease causing inversions have been  
65 discovered to be segregating in human populations (Stefansson et al., 2005).

66 Inversions are segregating in a wide variety of taxa (Coluzzi, Sabatini, Petrarca, & Di  
67 Deco, 1979; Engelbrecht, Taylor, Daniels, & Rambau, 2011; Kupper et al., 2016; Lee, Fishman,

68 Kelly, & Willis, 2016; Pyhäjärvi, Hufford, Mezmouk, & Ross-Ibarra, 2013; Silva et al., 2014;  
69 Diether Sperlich & Pfriem, 1986; Stefansson et al., 2005; Zinzow-Kramer et al., 2015) and are  
70 assumed to lead to the wealth of fixed chromosomal rearrangements observed between species  
71 (W. W. Anderson, Ayala, & Michod, 1977; Carson, 1992; Coluzzi, Sabatini, della Torre, Di  
72 Deco, & Petrarca, 2002; Fontaine et al., 2015; Levitan, 1992; McGraw, Davis, Young, &  
73 Thomas, 2011; Nishikawa et al., 2015; Wasserman, 1982). Indirect evidence has suggested that  
74 natural selection modulates the frequencies of gene arrangements because many show clinal  
75 variation across environmental gradients (Balanya et al., 2003; Cheng et al., 2012; Dobzhansky,  
76 1944; Martin Kapun, Fabian, Goudet, & Flatt, 2016; M. Kapun, Schmidt, Durmaz, Schmidt, &  
77 Flatt, 2016; M. Kapun, van Schalkwyk, McAllister, Flatt, & Schlotterer, 2014; Knibb, 1982;  
78 Knibb, Oakeshott, & Gibson, 1981; Mettler, Voelker, & Mukai, 1977) including independent  
79 parallel clines observed in northern and southern hemispheres, as well across different continents  
80 (A. R. Anderson, Hoffmann, McKechnie, Umina, & Weeks, 2005; Calboli, Kennington, &  
81 Partridge, 2003; Knibb, 1982; Kolaczowski, Kern, Holloway, & Begun, 2011; M. Santos et al.,  
82 2005). For example, natural selection acting on inversion polymorphism in *D. buzzatii* is  
83 thought to maintain the genetic architecture underlying thermal adaptation across an  
84 environmental gradient (Soto et al., 2010). Furthermore, environmental selection is hypothesized  
85 to shape the distribution of chromosomal arrangements in the malaria vector *Anopheles funestus*  
86 (D. Ayala et al., 2011) and inversions are implicated in clinal adaptation in other *Anopheles*  
87 species (Diego Ayala et al., 2017). Despite their pervasiveness both as polymorphisms within  
88 species and fixed differences between species, the mechanisms that establish and maintain  
89 different gene arrangements in populations are unclear.

90 Four broad classes of hypotheses have been proposed to explain how inversions are  
91 established in populations: (1) mutation and genetic drift, (2) hitchhiking with an adaptive  
92 mutation, (3) direct effects of the inversion mutation, and (4) indirect effects of suppressed  
93 recombination (Hoffmann & Rieseberg, 2008; Kirkpatrick & Barton, 2006). A new gene  
94 arrangement can be established by drift in small isolated populations subject to high rates of  
95 extinction and recolonization (Lande, 1984). An inversion could also rise to high frequency if it  
96 captures an adaptive allele that is sweeping through the population (Maynard Smith & Haigh,  
97 1974). Sperlich (1959) suggested that inversions could directly create selectable variation by  
98 altering structure or expression of genes flanking breakpoints (Fuller, Haynes, Richards, &  
99 Schaeffer, 2016). Another direct effect of inversions might be in their potential to form  
100 segregation distorters (Novitski, 1951). Inversions may also be established through the  
101 maintenance of linked associations of alleles because of their indirect effect of reducing  
102 recombinant gametes (Sturtevant & Beadle, 1936) either because the chromosome is free of  
103 deleterious recessive alleles (Nei, Kojima, & Schaffer, 1967; Ohta, 1971), the chromosome has  
104 epistatic combinations of alleles (Charlesworth & Charlesworth, 1973; Dobzhansky, 1950) or the  
105 chromosome has locally adapted alleles (Kirkpatrick & Barton, 2006).

106 *Drosophila pseudoobscura* has been used as a model system to investigate inversions in  
107 natural populations with > 30 different gene arrangements generated through single inversion  
108 events (Dobzhansky & Sturtevant, 1938; Powell, 1992). The polymorphism is estimated to be  
109 1.4-1.7 million years old (Aquadro, Weaver, Schaeffer, & Anderson, 1991; A. G. Wallace,  
110 Detweiler, & Schaeffer, 2011). Several lines of direct and indirect evidence suggest that selection  
111 helps establish and maintain the different gene arrangements. Five gene arrangements are  
112 frequent, widely distributed, and form clines across the southwestern United States where

113 frequency shifts coincide with changes in major physiographic provinces (Dobzhansky, 1944;  
114 Lobeck, 1948; Schaeffer, 2008) (Figure 1).

115         The geographic clines have been stable since their initial description in the 1940s (Wyatt  
116 W. Anderson et al., 1991; Dobzhansky, 1944) despite the homogenizing effect of extensive gene  
117 flow among populations (Coyne, Bryant, & Turelli, 1987; Kovacevic & Schaeffer, 2000; Riley,  
118 Hallas, & Lewontin, 1989; Schaeffer & Miller, 1992). Altitudinal clines have also been observed  
119 (Dobzhansky, 1948a) and frequencies of the gene arrangements show seasonal cycling  
120 (Dobzhansky, 1943). In some cases, inversion frequencies in population cage experiments  
121 formed stable equilibria mimicking patterns in natural populations (Dobzhansky, 1948b, 1950;  
122 Wright & Dobzhansky, 1946). Inversion polymorphism tended to be eliminated from population  
123 cages initiated with *D. pseudoobscura* (W. W. Anderson, Dobzhansky, & Kastritsis, 1967). The  
124 problem is that karyotypic fitness can vary among different climatic zones (Schaeffer, 2008) and  
125 the Anderson et al. (1967) population cage studies do not replicate natural climates.

126         Allozyme and nucleotide sequence polymorphism data support the indirect effect  
127 hypothesis because different arrangements are found to have unique allelic combinations  
128 (Prakash & Lewontin, 1968, 1971; Schaeffer et al., 2003), however, these results should be  
129 viewed with caution due to the small sample sizes and limited number of loci examined. Recent  
130 transcriptomic analyses have shown that inversions capture multiple differentially expressed  
131 genes among the arrangements further supporting the indirect effect of recombination  
132 suppression hypothesis (Fuller et al., 2016).

133         Schaeffer (2008) used numerical analyses of a selection-migration balance model to infer  
134 the fitnesses of gene arrangement karyotypes in six niches across the east-west inversion cline  
135 (Figure 1). The fitness estimates revealed over- and under-dominance operating on the gene

136 arrangement karyotypes in the different niches. The selection in heterogeneous environments  
137 model completely recapitulated the inversion cline from an ancestral arrangement where the  
138 frequencies of some arrangements both increased and decreased over time. The AR, PP, and CH  
139 arrangements show a steady increase to intermediate frequency from their origins suggesting that  
140 nucleotide variation at selected loci may show signatures of hard sweeps. The model also  
141 showed that ST had both increased and decreased depending on the frequency of other  
142 arrangements in the niche suggesting that patterns of ST nucleotide diversity may show a soft  
143 sweep signature. The cline observed across the southwestern United States only represents a  
144 portion of the ecological and karyotypic diversity seen in *D. pseudoobscura* with the species  
145 range extending into Mexico where the TL arrangement is found at much higher frequencies.

146         Inexpensive high-throughput sequencing methods now allow us to evaluate inversion  
147 establishment and maintenance hypotheses in more detail. Here, we present an analysis of 54  
148 third chromosomes (Muller C) from six *D. pseudoobscura* gene arrangements. We used large  
149 insert mate-pair libraries to map the inversion breakpoints to test one aspect of the position effect  
150 hypothesis, i.e., whether inversion breakpoints disrupt the coding regions of genes. To test a  
151 monophyletic origin of the arrangements, phylogenetic analyses across different syntenic regions  
152 of the third chromosome were carried out. Molecular population genetic analyses tested 2,669  
153 gene regions on the third chromosome for signatures of adaptive evolution and the structure of  
154 linkage disequilibrium was investigated across the chromosome to test for significant non-  
155 random associations as an indirect effect of suppressed recombination.

156

## 157 **Materials and Methods**

158           ***Drosophila pseudoobscura* Strains.** Genome sequences of 54 *D. pseudoobscura* strains  
159 were analyzed in this study. The genomes of 47 strains were described in the previous study of  
160 codon usage bias by Fuller et al. (2014). The strains were collected from the seven localities:  
161 Mount Saint Helena, CA (MSH), Santa Cruz Island, CA (SCI) (collected by Luciano Matzkin,  
162 University of Arizona), James Reserve, CA (JR) (collected by Wyatt W. Anderson, University of  
163 Georgia), Kaibab National Forest, AZ (KB), Bosque del Apache Wild Life Refuge (BdA,  
164 collected by Sara Sheeley, Upper Iowa University and provided by Bryant McAllister,  
165 University of Iowa), Davis Mountains, TX (DM), and San Pablo Etna, Oaxaca, Mexico (SPE123)  
166 (collected by Theresa A. Markow, UC San Diego). The genome sequences for seven additional  
167 strains were generated for this study. The strains carried one of six different gene arrangements:  
168 Standard (ST), Arrowhead (AR), Pikes Peak (PP), Chiricahua (CH), Cuernavaca (CU), or Tree  
169 Line (TL) (Dobzhansky & Sturtevant, 1938) (Figure 2). The strains were made homozygous for  
170 the third chromosome (Muller C, See Muller, 1940) by inbreeding, brother sister mating in a  
171 heterozygous strain, or balancer crosses (see Supporting Information).

172           **Illumina Library Construction and Sequencing.** Genomic DNA samples from single  
173 male flies of each strain were purified using Qiagen DNAeasy Blood and Tissue Kit following  
174 manufacturer recommendations, including an RNase digestion step. High molecular weight  
175 double stranded genomic DNA samples were constructed into Illumina paired end libraries  
176 according to the manufacturer's protocol (Illumina Inc.) with modifications as described in the  
177 Supporting Information. Sequencing analysis was first done with Illumina analysis pipeline.  
178 Sequencing image files were processed to generate base calls and phred-like base quality scores  
179 and to remove low-quality reads.



180           **Analysis of High Throughput Sequencing Reads and Final SNP Dataset.** The paired  
181 end sequence reads (101 bp) were aligned to the *D. pseudoobscura* reference strain FlyBase  
182 version 3.02 (<http://flybase.org>) using bwa-mem (v. 0.7.8 Li & Durbin, 2009) with default  
183 parameters. GATK (v. 3.1.1 McKenna et al., 2010) software was used to remove duplicate  
184 sequence reads, recalibrate base quality scores, and locally realign regions around indels for  
185 BWA alignments (DePristo et al., 2011). Pileup files generated with SAMtools (v. 0.1.19 Li et  
186 al., 2009) were used to determine the coverage distributions for each strain. The reference  
187 genome carries the AR arrangement (Richards et al., 2005). We called single nucleotide  
188 polymorphisms (SNPs) using the population haplotype-based software FreeBayes (v. 0.9.21  
189 Garrison & Marth, 2012). Sites with a phred-quality score less than 30 or coverage less than two  
190 were filtered from the data. On average, 96.066 % of nucleotide sites on the third chromosome  
191 were retained for each individual strain. Because our crossing scheme produced individuals  
192 isogenic for the third chromosome, we filtered sites called as heterozygous as they are likely to  
193 be the result of read misalignment, repetitive sequence regions, or poor read mapping. Of the  
194 19.8 Mb on the third chromosome, 0.03-0.06 % of the nucleotide sites were called as  
195 heterozygous with genotype Phred score >30. As described in Fuller et al.(2014), we found no  
196 evidence for clusters of such sites that might suggest particular regions that resisted becoming  
197 isogenic. A SNP table for the third chromosome is available through Scholarsphere  
198 (<https://scholarsphere.psu.edu>).

199           **Mapping Gene Arrangement Breakpoints.** The breakpoints of the 5.9 Mb inversion  
200 that converted the Standard arrangement into Arrowhead were previously mapped using PCR  
201 (Richards et al., 2005). Large insert (3 kb) mate-pair libraries were constructed for the  
202 PP\_DM1020\_B, CH\_JR4\_L, CH\_JR32\_B, TL\_MSH76\_B, and CU\_SPE123\_5-2\_B strains to

203 map the locations of derived breakpoints for the inversions that converted ST to PP, HY to ST,  
204 HY to SC, SC to CH, SC to CU, and SC to TL (see Figure 2 for the schematic maps and Figure  
205 S1 in the Supporting Information for the karyotypic maps). DNA from each strain was  
206 fragmented to an average size of 3 kb using the Nextera protocol from Illumina. The 3 kb  
207 fragments were circularized and sonicated to produce 400 bp fragments. The resulting DNAs  
208 were sequenced from the 5' and 3' ends. The sequenced fragments included both mate pairs  
209 where the ends are separated by 3 kb and paired ends separated by 400 bp. The reads from the  
210 mate-pair library were mapped to the *D. pseudoobscura* AR reference genome (MV 2-25 version  
211 3.02) using bwa-mem (v. 0.7.8 Li & Durbin, 2009) under default parameters. The resulting  
212 SAM file was used to locate the breakpoints (Corbett-Detig, Cardeno, & Langley, 2012). For  
213 more details about breakpoint mapping, see the Supporting Information.

214 **Phylogenetic Analysis of Gene Arrangements.** Previous molecular evolutionary  
215 analysis of a limited number of genetic markers across the third chromosome supported a unique  
216 origin of the different gene arrangements of *D. pseudoobscura* (Aquadro et al., 1991; A. G.  
217 Wallace et al., 2011). We performed phylogenetic analysis on the more complete SNP data from  
218 across the third chromosome to test whether inversions were of unique origin. In addition, we  
219 used phylogenetic analysis of SNPs from 14 syntenic blocks across the chromosome to  
220 determine if all regions have a similar history. We used neighbor-joining as implemented in  
221 MEGA6 (Koichiro Tamura, Stecher, Peterson, Filipinski, & Kumar, 2013) to infer the  
222 relationships among the 54 *D. pseudoobscura* strains using the outgroup strain, *D. miranda*  
223 (Saitou & Nei, 1987). The evolutionary distances were computed using the Maximum Composite  
224 Likelihood method (K. Tamura, Nei, & Kumar, 2004) assuming either a uniform or  
225 heterogeneous rate of evolution. All positions containing gaps and missing data were eliminated.

226 The percentage of replicate trees in which the associated taxa clustered together were determined  
227 with 500 bootstrap replicates (Felsenstein, 1985).

228 **Classification of SNP sites.** The inversions represent different subpopulations and we  
229 can test for genes with significant elevated frequencies of unique derived mutations, which are  
230 candidate genes targeted by adaptive evolution. The segregating sites discovered in this sample  
231 are a composite of unique and shared mutations. A unique derived mutation was one that  
232 occurred on the branch immediately before or after the inversion mutation. Shared mutations  
233 either predate two or more inversion mutations or are alleles transferred among arrangements via  
234 gene conversion or double cross overs (Arcadio Navarro, Betrán, Barbadilla, & Ruiz, 1997).  
235 Shared polymorphisms could also result from the balancer crosses that were used to generate the  
236 isochromosomal strains (Miller et al., 2016). See the Supporting Information for more details on  
237 how polymorphic sites were classified.

238 **Estimates of Site Frequency Spectrum and Mean Derived Allele Frequency within**  
239 **Protein Coding Genes within Chromosomal Arrangements.** A total of 2,669 protein coding  
240 gene models are annotated for the third chromosome in release Dpse 3.02 FB14\_04 in FlyBase  
241 (<http://flybase.org>). We examined the site frequency spectrum and mean derived allele frequency  
242 (DAF) for each gene including 1,000 bps upstream and downstream of the annotated  
243 transcriptional start and end sites. We used the largest of multiple encoded transcripts for each  
244 gene. The site frequency spectrum for each gene was summarized with the ratio of Tajima's  $D$   
245 (1989) to the absolute value of its theoretical minimum ( $D_{\min}$ ), which occurs when all  
246 segregating sites have a frequency of  $1/n$ , where  $n$  is the sample size. Tajima's  $D$  is sensitive to  
247 sample size and numbers of segregating sites, but  $D/|D_{\min}|$  controls for arrangements with  
248 different sample sizes (Schaeffer, 2002). The  $D/|D_{\min}|$  has a minimum value of -1 and its mean

249 value will reflect the demographic history of the population, which should be similar for all loci  
250 in the genome (Hahn, Rausher, & Cunningham, 2002; Schaeffer, 2002). We used a random  
251 permutation test to detect outlier loci that have clusters of low or high frequency variants.  
252 Shuffling the position of sites will break up these clusters such that the observed values of  
253  $D/|D_{\min}|$  will be more extreme than the values based on random permutations for a given number  
254 of segregating sites and the mean local site frequency spectrum in proximal, inverted, or distal  
255 regions. The segregating sites within each region were shuffled without replacement 100,000  
256 times and we estimated how often the permuted Tajima's  $D/|D_{\min}|$  was more extreme than the  
257 observed value in the gene region. This approach maintained the linkage relationships of  
258 variable nucleotides within the chromosome region. We used the  $q$ -value method with a false  
259 discovery rate (FDR) of 0.01 to correct for multiple tests (Storey, 2002, 2003). Shared and  
260 unique SNPs were analyzed separately for the five gene arrangements with sample sizes greater  
261 than eight, Arrowhead (15), Standard (8), Pikes Peak (10), Chiricahua (9), and Tree Line (9). A  
262 similar approach was used to detect significant clusters of high frequency derived unique  
263 mutations per segregating site (DAF) in the 2,669 genes, which includes polymorphic and fixed  
264 mutations.

265 **Population Specific Branch Length Tests.** A second method to detect outlier genes that  
266 accumulated large numbers of arrangement specific mutations is similar to other statistics such  
267 as the "Population Branch Statistic" (PBS; Yi et al., 2010) and "Locus Specific Branch Length"  
268 (LSBL; Shriver et al., 2004). This test has been used to identify loci with evidence of adaptive  
269 evolution (Huerta-Sanchez et al., 2013). Prior use of PBS and LSBL require exactly three  
270 subpopulations. Here, we extend these methods to an unrooted phylogeny of known topology

271 containing any number of branches and nodes and details of the analysis can be found in  
272 Supporting Information.

273 We estimated the Population Specific Branch Length (PSBL) for each gene on the third  
274 chromosome including 1 kb upstream and downstream. We used similar bootstrap approaches as  
275 our analyses of  $D/|D_{\min}|$  and DAF, to detect significantly large PSBL estimates with a false  
276 discovery rate (FDR) of 0.01 (Storey, 2002, 2003).

277 The detection of statistical outliers could be performed with coalescent simulations which  
278 specify the demographic history of each arrangement. We know the branching order of the  
279 different gene arrangements, but we have insufficient information about the demography of each  
280 arrangement to carefully specify a precise model for the system of inversions. For this reason,  
281 we used random permutation tests that shuffled SNP positions and looked for genes that were  
282 statistical outliers rather than searching for parameter values that could support any particular  
283 model or hypothesis.

284 **Detection of Putative Functional Variation in Protein Coding Genes Within Gene**  
285 **Arrangements.** We extracted and translated the 2,669 third chromosome coding sequences from  
286 the *D. pseudoobscura* reference annotation version 3.02 available from FlyBase, (dos Santos et  
287 al., 2015). We used the same scoring scheme that was used to classify nucleotide polymorphisms  
288 (Figure S2 in the Supporting Information). Variation in stop codons was counted in the data set.  
289 We inferred the amino acid transition matrix counting the number of events from the ancestral to  
290 derived amino acids. Additionally, we examined the frequency spectrum of the amino acid  
291 transitions for all sites.

292 **Detection of Significant Linkage Disequilibrium.** Linkage disequilibrium was  
293 characterized for all polymorphic sites across the third chromosome using the correlation based

294 approach of Zaykin *et al.* (2008), similar to  $r^2$  (Hill & Robertson, 1968). A heat map image  
295 matrix was generated by taking the average significance values at 100 adjacent sites. At each  
296 polymorphic site, we also performed a Fisher's exact test to assess the significance of allele  
297 association within chromosomal arrangements. All significance values were corrected for  
298 multiple testing by controlling the FDR (Storey, 2003).  
299

## 300 **Results**

301 **Map of Inversion Breakpoints.** Thirty eight genetic and physical markers from Muller  
302 C were used to bracket the locations of each breakpoint in the AR reference sequence (see  
303 Supplemental Table 21 Muller C tab, Schaeffer et al., 2008). Seven pairs of inversion  
304 breakpoints were mapped with the mate pair data similar to previous approaches (Corbett-Detig  
305 et al., 2012; Cridland & Thornton, 2010)(See Supporting Information). Mate pair reads that  
306 mapped at megabase distances apart are candidates for breakpoint positions if the two ends  
307 coincide with the approximate locations of breakpoints on the cytological map (Dobzhansky,  
308 1944; Dobzhansky & Sturtevant, 1938).

309 All breakpoints mapped within intergenic regions and not within the transcripts of the  
310 boundary genes (Table 1). An average of ~4.5 breaks (95% CI: 1-8) are expected in intergenic  
311 regions if 14 breakpoints are placed randomly, using a uniform distribution, on the third  
312 chromosome map that includes 6.3 Mb of intergenic regions and 13.4 Mb of coding nucleotides.  
313 Four of the thirteen breakpoint regions had nucleotide sites with elevated coverage (pHYSC,  
314 pSTAR, dSTAR, and pSCCH). We failed to observe elevated read coverage in any boundary  
315 gene indicating that genes adjacent to inversion breakpoints are not duplicated as has been  
316 observed in other *Drosophila* breakpoints (Calvete, Gonzalez, Betran, & Ruiz, 2012; Guillen &  
317 Ruiz, 2012; Papaceit, Segarra, & Aguadé, 2013; Puerma et al., 2014; Ranz et al., 2007).

318 **Phylogenetic Relationships of Arrangements 14 Syntenic Regions Show Diverse**  
319 **Histories across the Third Chromosome.** We used paired-end reads generated from each strain  
320 to identify single nucleotide polymorphisms (SNPs). The median coverage across all strains was  
321 35 (Table S4 and Figure S24). From these aligned reads, we identified 1,028,037 SNPs on the

322 third chromosome and estimated error rates to vary from  $9.7 \times 10^{-4}$  in AR to  $3.4 \times 10^{-3}$  in PP, CH,  
323 and TL using a set of previously sequenced markers (Tables S5 and S6).

324 The overall phylogenetic tree supports the unique origin hypothesis based on the  
325 monophyletic relationship of each of the six arrangements (Figure 3) consistent with RFLP and  
326 short nucleotide marker data (Aquadro et al., 1991; A. G. Wallace et al., 2011). The root of the  
327 tree, HY, was also confirmed with gene adjacency information at the breakpoints (Bhutkar et al.,  
328 2008)(See Identification of Inversion Breakpoints in Supporting Information). The branching  
329 order is consistent with the cytogenetic phylogeny, except that PP is inferred to be the sister  
330 clade to the AR, ST, CH, CU, and TL gene arrangements rather than forming a monophyletic  
331 group with ST and AR (Dobzhansky & Sturtevant, 1938).

332 We tested whether PP showed this unexpected relationship in all regions of the third  
333 chromosome (Figure 2). We used neighbor-joining to infer the relationships among the six  
334 arrangements in the 14 syntenic regions (Figure 4, Figures S25-S38 in the Supporting  
335 Information). The six gene arrangements form monophyletic clusters in the central syntenic  
336 blocks where recombination is reduced. Not all syntenic blocks, however, are concordant with  
337 the established cytogenetic phylogeny, e.g., see regions 68C-69C, 69D-70A, 76C-78A, and 78B-  
338 79A in Figure 4 compared with the cytogenetic phylogeny in (Figure 2). PP consistently diverges  
339 before the split of the AR and ST lineages within the ST phylad in these four regions. The  
340 branching order of the CH, CU, and TL arrangements within the Santa Cruz phylad is also not  
341 consistent among these four syntenic regions. While CU is always the most derived member of  
342 the Santa Cruz phylad, it is not clear whether CH or TL is the more ancestral member.

343 In syntenic regions that are discordant with the cytogenetic phylogeny, the PP clade is the  
344 most inconsistent group. PP clusters with the Santa Cruz phylad in four regions (76B, 76A-74C,



345 74B-70D, 70C-70B) and is basal to the phylad in two of the four regions (76B, 76A-74C). PP is  
346 sister to TL in the other two blocks (74B-70D and 70C-70B). Block 74B-70D is also unusual  
347 because the CH and CU clades cluster with the Standard phylad. In the three remaining syntenic  
348 blocks (79B, 79C-79D, 80A-81D), PP strains fail to form monophyletic groups and clusters  
349 among the AR and ST strains.

350 **The Site Frequency Spectrum of Inversion-Specific Mutations.** We examined the site  
351 frequency spectra of inversion-specific mutations with Tajima's  $D/|D_{\min}|$  (Figure 5). The  
352 frequency spectra shows more high frequency variants near and within inverted regions and an  
353 excess of rare variants in the proximal and distal regions. Proximal and distal regions have more  
354 shared than unique polymorphisms and the frequency of derived mutations is higher in shared  
355 versus unique polymorphisms with random permutation tests in five arrangements (All  
356 arrangements and regions  $P < 1.0 \times 10^{-3}$ ) (Table 3) and Chi square tests of homogeneity (AR,  
357  $X^2=12,688.9$ ,  $df=2$ ,  $P < 1 \times 10^{-6}$ ; PP,  $X^2=14,562.0$ ,  $df=2$ ,  $P < 1 \times 10^{-6}$ ; CH,  $X^2=8,923.5$ ,  $df=2$ ,  $P <$   
358  $1 \times 10^{-6}$ ; TL,  $X^2=12,495.1$ ,  $df=2$ ,  $P < 1 \times 10^{-6}$ ; CU,  $X^2=457.8$ ,  $df=2$ ,  $P < 1 \times 10^{-6}$ ). ST has an excess of  
359 unique SNPs in the proximal region compared to the inverted and distal regions (ST,  
360  $X^2=1,345.1$ ,  $df=2$ ,  $P < 1 \times 10^{-6}$ ).

361 We tested for outlier genes that either have significant excesses of low ( $D/|D_{\min}| < 0$ ) or  
362 intermediate ( $D/|D_{\min}| > 0$ ) frequency SNPs. The majority of extremely low values of  $D/|D_{\min}|$  are  
363 found in the proximal and distal regions where shared mutations with higher frequencies were  
364 removed leaving younger low frequency mutations. Significant elevations in  $D/|D_{\min}|$  occurred  
365 for genes within the inversion where fewer shared polymorphisms were removed. For ST and  
366 CH, the elevation of Tajima's  $D/|D_{\min}|$  extends approximately five and seven Mb upstream of the  
367 proximal breakpoint, respectively.

368 We estimated  $D/|D_{\min}|$  for the non-inverted second chromosome (McGaugh et al., 2012).  
369 Tajima's  $D/|D_{\min}|$  varies uniformly across chromosome two with a mean  $D/|D_{\min}|$  of -0.55, which  
370 is consistent with a population expansion parameter ( $Nr$ ) of 30 based on coalescent simulations  
371 (McGaugh et al., 2012; Schaeffer, 2002) (See Supporting Information and Figure S39). Fifteen  
372 regions show a significantly excess of intermediate frequency variants and thirty regions have a  
373 significant excess of rare variants (Figure S39). This indicates the pattern of Tajima's  $D/|D_{\min}|$   
374 across the inverted third chromosome is influenced by the presence of inversions.

375 The mean values of Tajima's  $D/|D_{\min}|$  for the five arrangements are AR = -0.72, ST = -  
376 0.53, PP = -0.33, CH = -0.41, and TL = -0.49. The  $D/|D_{\min}|$  values for ST, CH, and TL are similar  
377 to that of the second chromosome consistent with a similar demographic history. The  
378 distribution of  $D/|D_{\min}|$  for AR is more negative than the other arrangements suggesting a greater  
379 rate of expansion for this chromosome.

380 **Detection of Protein Coding Regions with Elevated Frequencies of Derived**  
381 **Mutations.** The site frequency spectrum as summarized by Tajima's  $D/|D_{\min}|$  does not include  
382 nucleotide sites that are fixed within a gene arrangement background in our sample. We  
383 estimated the mean derived allele frequencies (DAF) of unique polymorphisms in the 2,669  
384 genes and tested loci for significant clusters of high frequency alleles using random permutation  
385 tests (Figure 6). The AR, ST, PP, CH, and TL arrangements had 138, 229, 233, 161, and 173  
386 genes, respectively, with a significant elevation of mean DAF per segregating site. The mean  
387 DAF tends to be at its lowest near the centromere and telomere and increases near the inversion  
388 breakpoints with the highest values observed within the inverted regions and up to 1 Mb  
389 upstream or downstream. The exceptions are ST and CH where the mean DAF is elevated within  
390 five to seven Mb of the proximal breakpoint, which overlaps with the inverted region of AR.

391 The mean DAF frequency is uniformly low across chromosome two (~0.2) not reaching the high  
392 values seen for any arrangement on the third chromosome (See Figure S39 in Supporting  
393 Information).

#### 394 **Detection of Arrangement Specific Allele Frequency Changes with Population**

395 **Specific Branch Length Analysis.** Population specific branch length (PSBL) analysis allowed  
396 us to determine which gene regions have a significantly high proportion of arrangement specific  
397 allele frequency changes (see Figure 7 and Supplemental Spreadsheet 1). A significantly long  
398 branch will occur if a gene has an excess of arrangement specific mutations relative to the other  
399 four arrangements. For each lineage on the phylogeny, intervals with the longest branch lengths  
400 are located within or near inversion breakpoints. The mean branch length for genes in inverted  
401 regions is significantly greater than for genes located outside of the breakpoints in every case  
402 (Wilcoxon rank-sum test,  $P < 0.05$ ). After correcting for multiple testing with a FDR of 0.01, we  
403 determined that 317, 380, 396, 350, and 340 genes had a significantly long branch length in the  
404 AR, ST, PP, and CH arrangements, respectively. Of these, 71, 130, 192, 74, and 75 genes had  
405 long branches only within AR, ST, PP, CH, and TL, respectively. Some genes had longer  
406 branches in multiple arrangements with 249, 149, 54, and 16 genes in two, three, four, or five  
407 arrangements, respectively. A total of 1,659 genes did not have a significantly long branch length  
408 in any of the five arrangements, while 1,010 genes had a significantly long branch length in at  
409 least one arrangement.

#### 410 **Elevated Derived Allele Frequencies and Fixed Amino Acid Changes within**

411 **Inverted Gene Regions.** Here, we ask how many of the DAF and PSBL outlier gene regions  
412 also harbor at least one fixed amino acid change within a particular arrangement in our sample.  
413 A total of 277 gene regions DAF and PSBL outlier genes contained at least one fixed amino acid

414 difference in at least one gene arrangement. There are 28, 74, 144, 31, and 47 outlier genes with  
415 at least one fixed amino acid in AR, ST, PP, CH, or TL, respectively. Chi-square tests of  
416 homogeneity support a heterogeneous distribution of candidate selected genes with more outliers  
417 in inverted regions for all arrangements except ST (AR,  $X^2=24.1$ ,  $df=2$ ,  $P=5.9 \times 10^{-6}$ ; ST,  $X^2=9.2$ ,  
418  $df=2$ ,  $P=0.010$ ; PP,  $X^2=36.1$ ,  $df=2$ ,  $P=1.4 \times 10^{-8}$ ; CH,  $X^2=28.7$ ,  $df=2$ ,  $P=5.7 \times 10^{-7}$ ; TL,  $X^2=42.2$ ,  
419  $df=2$ ,  $P=6.9 \times 10^{-10}$ ).

420 The outlier genes are found across the length of the inverted regions, but are not  
421 uniformly distributed based on Kolmogorov-Smirnov tests (AR  $D_{\max}=-0.258$   $P=0.005$ ; ST,  
422  $D_{\max}=0.387$   $P=0.001$ ; PP  $D_{\max}=0.387$   $P<1 \times 10^{-4}$ ; CH  $D_{\max}=-0.285$   $P=0.001$ ; TL  $D_{\max}=-0.555$   $P<1$   
423  $\times 10^{-4}$ ). The distance of the closest outlier gene to the center of the inverted region in AR, ST, PP,  
424 CH, and TL is 0.92, 0.62, 0.04, 0.08, and 0.11 Mb, or 15.5, 20.0, 0.3, 1.7, and 1.7 % of the total  
425 inversion size, respectively. Genes with the maximum DAF frequency or PSBL are more  
426 centrally located within the inverted region and are not adjacent to either the proximal or distal  
427 breakpoints in each case.

428 We tested for a linear association between the size of each chromosomal region  
429 (proximal, inverted, and distal) and the proportion of genes showing evidence of adaptive  
430 evolution (Table 4), observing a significant positive relationship ( $P=0.003$ ,  $R^2=0.96$ ). While there  
431 is a positive correlation in proximal and distal regions, the relationship is not significant  
432 (proximal:  $P=0.14$ ,  $R^2=0.57$ ; distal:  $P=0.37$ ,  $R^2=0.27$ ). In four gene arrangements (AR, PP, TL,  
433 CH), there is an excess of candidate adaptive genes within inverted regions.

434 We asked if recombination rates varies within and outside of outlier gene regions using  
435 the fine-scale maps of the population scaled recombination rate  $\rho$  across all arrangements  
436 estimated by Fuller et al. (2014). Outlier genes within inverted regions have significantly lower

437 mean estimates of  $\rho$  than non-outlier genes (Table 5 and Figure 8). These data show strongly  
438 differentiated genes interspersed among regions that experience higher levels of recombination  
439 within the inversion especially in the middle of the inversion which should be sufficient to  
440 decrease LD (Schaeffer & Anderson, 2005).

441 Each arrangement has at least one gene with multiple fixed amino acid changes in our  
442 sample. Of these, the GA16823 gene in CH has the smallest number of fixed amino acid  
443 differences (9) while GA24454 in PP is the most extreme case with 47 fixed changes. In *D.*  
444 *melanogaster*, the ortholog of GA24454 is CG33017 and polymorphisms in the gene are  
445 significantly associated with olfactory responses to 2-phenyl ethyl alcohol (Arya et al., 2015).  
446 GA24454 is within inverted regions when PP and CU are paired with AR, ST, CH, or TL,  
447 however, the gene is outside inverted regions in heterozygotes in all other heterokaryotypes.  
448 Even though 207 amino acid polymorphisms are segregating in GA24454 across all  
449 arrangements, none of the other arrangements has a fixed amino acid difference. Coalescent  
450 simulations show that 47 fixed amino acid changes is greater than expected with a model of  
451 nested subsamples given 207 segregating amino acids ( $P=0.028$ ; Hudson & Kaplan, 1986;  
452 Schaeffer et al., 2003). Furthermore, PP has only three shared amino acid polymorphisms while  
453 non-PP arrangements have 12 to 26 shared amino acid polymorphisms. The significantly large  
454 number of fixed amino acid differences in PP is evidence for adaptive evolution in GA24454.

455 **Lack of Extended Haplotype Homozygosity Surrounding Fixed Unique Nucleotide**  
456 **Alleles.** At each fixed, derived site within an arrangement, we estimated the integrated  
457 haplotype score (*iHS*) to test for extended haplotype structure (See Figure S41 in the Supporting  
458 Information). Long stretches of extended homozygosity within an arrangement are likely to be  
459 associated with a strong or recent selection event. In each arrangement, we detected at least one

460 site with an extreme positive or extreme negative ( $\pm 3$ ) *iHS* value. Non-neutral forces are  
461 expected to generate clusters of consecutive sites with extreme *iHS* values. We find evidence for  
462 only one such interval in any arrangement, an ~18-kb stretch from 9,271,032 to 9,289,710 in AR.  
463 The interval intersects the coding regions of two overlapping genes (GA12653 and GA24326)  
464 neither of which showed a significantly elevated mean DAF or PSBL. For all other  
465 arrangements, no significant intervals of consecutive extreme *iHS* scores were observed.

466 **Third Chromosome Linkage Disequilibrium Patterns.** Now we ask whether  
467 significant associations between sites decay with distance across the third chromosome (Figure 9).  
468 In *D. melanogaster*, LD tends to decay rapidly within the genome through recombination  
469 (Langley et al., 2012; Mackay et al., 2012), although recombination appears to be suppressed  
470 across the length of the inverted regions here (Fuller et al., 2016). In proximal and distal regions  
471 of the chromosome, we observe few pairwise comparisons that are in significant LD (3.97% of  
472 all comparisons). However, we find extensive LD generated within inverted regions (20.29% of  
473 all comparisons) and observe a significantly elevated proportion of significant pairwise  
474 comparisons present relative to non-inverted segments (Wilcoxon rank-sum test,  $P < 0.05$ ).  
475 Furthermore, multiple arrangements show significant associations between SNPs and  
476 arrangements with Fisher's Exact Test across the majority of the chromosome (Figure 9)  
477 indicating that the pattern of LD is not being driven by a single arrangement. The exception is in  
478 the region where only PP differs from the other arrangements. Nucleotide variation around the  
479 proximal and distal breakpoints did not always show significant LD (Figure S42 in Supporting  
480 Information).

481 **Evidence for Differentiation among Inversions, but not Populations.** The six  
482 arrangements sampled were collected from five different geographic locations. We found

483 minimal evidence for geographic differentiation (Table 2). Population-specific singletons account  
484 for 9.8 to 19.8% of the total unique polymorphism and the majority of derived polymorphisms  
485 (70.9 to 89.3 %) are shared among populations. The Mexican (SPE) population did have 56  
486 (0.01%) unique fixed differences, but the other four populations did not have fixed unique  
487 derived polymorphisms. The extensive shared polymorphisms among geographic locations and  
488 lack of fixed differences are consistent with extensive gene flow among populations.

489 Gene arrangements, on the other hand, are differentiated from each other. Inversion  
490 specific polymorphism with a frequency of 1 in our sample account for 13.5 to 23.6 % of the  
491 observed unique polymorphism. Despite suppressed recombination in inverted regions, the  
492 majority of derived polymorphisms (56.3 to 78.7 %) are shared among arrangements. All  
493 arrangements have a greater proportion of fixed unique polymorphisms (0.8 to 7.4%) than the  
494 geographic populations. Gene arrangements harbor a substantial proportion of fixed unique sites,  
495 even in the presence of extensive shared polymorphism.

496 **Gene Ontology.** To test for enrichment of common biological functions in the genes  
497 displaying evidence of adaptive evolution, we performed a Gene Ontology (GO) analysis using  
498 DAVID (v6.8) software (Huang, Sherman, & Lempicki, 2009a, 2009b). We note that direct  
499 experimental evidence is needed to confirm any of our results, however our analyses provide  
500 insight into genes with signals of adaptive evolution involved in similar biological functions that  
501 may underlie the targets of selection acting on the inversion polymorphism. For genes across all  
502 arrangements with at least one fixed amino acid change and significant mean DAF and PSBL,  
503 after correcting for multiple testing there is a significant enrichment of categories including  
504 odorant binding ( $q < 8.75 \times 10^{-4}$ ; see Table 5) and neuroactive ligand-receptor interaction ( $q <$   
505  $1.34 \times 10^{-3}$ ). Several other categories of potential biological interest, including starch and

506 sucrose metabolism and limonene and pinene degradation, contain genes which show evidence  
507 of adaptive evolution, although they are not significantly enriched.

508 Limonene and pinene are monoterpenes that are produced by a variety of plant species,  
509 including several coniferous pines, which have fungicidal properties and act as repellants to  
510 insects such as the mountain pine beetle (*Dendroctonus ponderosae*) (Wang et al., 2014). The  
511 composition of limonene and pinene in the resin of the Ponderosa pine (*Pinus ponderosa*) varies  
512 clinally across the Southwestern United States and in the overlapping species range of *D.*  
513 *pseudoobscura* (Smith, 1977). Furthermore, *D. ponderosae* has been shown to differentially  
514 colonize pines depending on the composition of monoterpenes, indicating that the species has  
515 evolved the ability to preferentially recognize the relative abundance of limonene and pinene  
516 (Thoss & Byers, 2006). A number of significant differentially expressed genes between *D.*  
517 *pseudoobscura* arrangements are also involved in limonene and pinene degradation (Fuller et al.  
518 2016). Despite the wealth of genetic information supported by nearly a century of research in *D.*  
519 *pseudoobscura*, little is known regarding the species' ecology and life history in nature. Our  
520 results here may suggest a link between the environment of *D. pseudoobscura* and genes  
521 showing evidence of adaptive evolution involved in sensory perception, metabolism and  
522 limonene and pinene degradation.

523

## 524 **Discussion**

525 **Test of the Position Effect Hypothesis.** The breakpoints examined here reject the  
526 position effect hypothesis in a narrow sense because none of the breaks disrupted the coding  
527 sequences of genes. Breakpoints may also generate position effects by altering the expression of  
528 boundary genes. Fuller et al. (2016) found only one case where a gene immediately adjacent to a



529 breakpoint was differentially expressed. The gene GA22082, which is adjacent to the nearly  
530 coincident pHYST and dSTPP breakpoints, is expressed higher in ST than in PP chromosomes in  
531 larvae. Inversion events could also disrupt gene expression beyond breakpoints by altering  
532 topologically associated domains (TADs) (Hou, Li, Qin, & Corces, 2012). TADs partition the  
533 genome into structural domains within the nucleus that may be important for the coordination of  
534 gene expression. We inferred TADs in *D. pseudoobscura* based on synteny with TADs in *D.*  
535 *melanogaster* (Hou et al., 2012) (unpublished data). The 14 inversion breakpoints involve 20 *D.*  
536 *melanogaster* TADs. Five breakpoints (pHYSC, dSCCU, pSTAR, pSCTL, and dSTAR) disrupt  
537 a TAD and contain one or two differentially expressed genes (max: 2). The ST to AR event is  
538 particularly interesting because it splits a 79 kb TAD in half and leads to differential expression  
539 of two genes within the TAD on either side of the break. These results are intriguing, but should  
540 be viewed with caution because we do not have experimental evidence to suggest that TAD  
541 structure has been conserved between *D. melanogaster* and *D. pseudoobscura*.

542         There are other possible mechanisms for inversions to directly generate variation in the  
543 population. Novitski (1967) suggested that crossing over in inversion heterozygotes could set up  
544 conditions for meiotic drive to operate. Certain cross over events could lead to chromatids that  
545 differ in length such that shorter chromatids are transmitted at higher frequencies. Finally,  
546 Corbett-Detig (2016) showed that large inversions are often in close proximity to “sensitive  
547 sites” in the *D. melanogaster* genome. Sensitive sites normally promote crossing over, however,  
548 an inversion can lead reduce levels of genetic exchange when near the sensitive sites. Corbett-  
549 Detig (2016) concluded this can lead to a selective advantage for the inversion. Here, we  
550 conclude that breakpoint lesions have had minimal effects in generating phenotypic variation  
551 through the structural or expression alterations of boundary genes for selection to act on,

552 however, further studies that map *D. pseudoobscura* TADs in different arrangements, test for  
553 meiotic drive in heterozygotes, and map sensitive sites in *D. pseudoobscura* are needed to fully  
554 reject the position effect hypothesis.

555 **Gene Phylogenies Support the Unique Origin of the Gene Arrangements.** The  
556 phylogeny based on SNP variation across the third chromosome mirrors the history of the  
557 inversion mutations. Phylogenetic analysis supports the unique origin of the different  
558 arrangements except for regions near the centromere and telomere where recombination is  
559 prevalent. The expected phylogeny of the different arrangements is largely consistent with the  
560 cytogenetic phylogeny (Dobzhansky & Sturtevant, 1938), although some syntenic regions show  
561 an aberrant clustering of PP with TL.

562 One possible explanation for aberrant cluster of PP and TL is that there was an ancestral  
563 genetic exchange event. PP and TL have 739 SNPs that are shared between the arrangements in  
564 our samples. Although these regions are located within inverted regions of PP/TL heterozygotes,  
565 there is a 6.3 Mb region that can pair in the heterokaryotypes including regions (68C-69D, 69D-  
566 70A, 70B-70C, and 70D-74B). PP and TL do occur in the same populations and  
567 heterokaryotypes can form at appreciable frequencies allowing for recombinants. Indeed, PP/TL  
568 heterokaryotypes frequencies have been recorded as high as 32% in Mexico (Salceda, Guzman-  
569 Rincon, Rosa, & Olvera, 2015). The size of the region affected suggests that perhaps a double  
570 cross over event generated shared variation between the two arrangements (Arcadio Navarro et  
571 al., 1997) and the exchanged segment may have transferred adaptive genes based on a number of  
572 outlier genes that map to this segment.

573 **Evolutionary Forces for the Establishment and Maintenance of New Inversions.**  
574 Here, we provide novel insights into the evolutionary forces that establish new inversion

575 mutations in populations. If a new inversion increases by strictly neutral forces, as the  
576 arrangement increases in frequency, it will carry the allelic variants initially captured from the  
577 ancestral arrangement along with it and lead to extensive LD across the inverted region. Over  
578 time, LD of SNPs associated with the gene arrangement will decrease through genetic exchange  
579 except nearest to the breakpoints (Arcadio Navarro, Barbadilla, & Ruiz, 2000; Arcadio Navarro  
580 et al., 1997; Peischl, Koch, Guerrero, & Kirkpatrick, 2013). How much decay depends on the  
581 size of the inversion with larger inversions showing a greater reduction in LD in central regions  
582 than smaller inversions (Arcadio Navarro et al., 1997). The ages of the *D. pseudoobscura*  
583 arrangements are 0.5 to 1.4 million years old, which should be sufficient time for LD of variation  
584 to decay except near the breakpoints.

585         We can rule out genetic drift as an explanation for the inversion polymorphism in *D.*  
586 *pseudoobscura*. If genetic drift is responsible for the establishment and maintenance of the  
587 arrangements, their frequency is expected to be related to their relative ages (Kimura & Ohta,  
588 1973), leading to higher levels of variation (Arcadio Navarro et al., 2000) and lower levels of LD  
589 (Hartl & Clark, 1997; Toomajian, Ajioka, Jorde, Kushner, & Kreitman, 2003). The strongest  
590 evidence against genetic drift is the pattern of variation in the AR chromosome. AR is the most  
591 frequent arrangement in the Southwestern United States suggesting that it is one of the oldest  
592 chromosomes, yet AR is relatively young because it was derived from the ST arrangement. This  
593 implies that AR emerged from the ST chromosome and has rapidly spread from California to  
594 Texas. The average value of Tajima's  $D|D_{\min}|$  across AR is more negative than any other  
595 arrangement, which is consistent with a recent expansion. A similar observation is found in the  
596 closely related species *D. subobscura*, where allele frequencies of microsatellite markers have  
597 been shown to increase more than expected under genetic drift alone likely due to a recent

598 expansion (J. Santos et al., 2016). The lack of significant windows of extended homozygosity in  
599 AR suggests that even though this arrangement is relatively young, there has been sufficient time  
600 for gene conversion break up LD. Additionally, genetic drift can be ruled out because each  
601 arrangement has multiple outlier genes which are spread across the inverted region. One would  
602 not expect outlier genes in the central region of the inversion because there has been sufficient  
603 time for gene conversion and crossovers to degrade LD.

604         Next, we can rule out a single beneficial sweeping allele because we find evidence for not  
605 one, but multiple outlier genes within the gene arrangements showing evidence of adaptive  
606 evolution. We find evidence of multiple genes with long branch lengths or elevated frequencies  
607 of derived mutations broken up by regions with high frequencies of shared polymorphisms. This  
608 is consistent with previous results showing multiple significantly differentially expressed genes  
609 between third chromosome arrangements maintained by the inversions (Fuller et al., 2016).  
610 Multiple loci are also thought to be functionally important for adaptive inversion clines in *D.*  
611 *melanogaster* (Kennington, Partridge, & Hoffmann, 2006).

612         The most likely explanation for the establishment and maintenance of chromosomal  
613 inversions in *D. pseudoobscura* is that inversions act as negative modifiers of recombination  
614 holding adaptive haplotypes together. By limiting genetic exchange, the original inversion  
615 mutation captures sets of linked alleles and maintains their associations. This is supported by the  
616 numbers of outlier genes that show evidence of adaptive evolution and the pattern of LD across  
617 the chromosome. Our surprising finding was that regions of the chromosome with high levels of  
618 LD are interspersed with regions of low LD or high values of  $\rho$ . In addition, we observed few  
619 regions of unusual haplotype structure or extended homozygosity within arrangements. We  
620 hypothesize that gene conversion and double crossovers can break up associations across an

621 arrangement, but purifying selection removes any maladaptive combinations, consistent with  
622 inversion establishment models (Charlesworth & Charlesworth, 1973). These results should be  
623 interpreted with caution because some of the shared polymorphism we observe may be due to  
624 gene conversion events from balancer chromosomes used to create the isogenic strains (Miller et  
625 al., 2016).

626 Two models are consistent with the establishment of inversions to reduce recombination,  
627 the local adaptation and epistasis models, which may not be mutually exclusive. The distinction  
628 between these two hypotheses is whether the gene products interact at the molecular level or  
629 have a synergistic effect on fitness. Under the local adaptation model, there is no need for the  
630 gene products to interact or act synergistically either in a genetic pathway or as transcription  
631 factors regulating a common gene (Kirkpatrick & Barton, 2006). The geographic range of *D.*  
632 *pseudoobscura* straddles several physiographic provinces (Lobeck, 1948) and adult flies are  
633 capable of dispersing among these ecological niches. Numerical analysis has shown that  
634 geographic inversion frequencies of *D. pseudoobscura* are consistent with a model of selection in  
635 heterogeneous environments (Schaeffer, 2008). However, it remains unclear why multiple  
636 arrangements exist in single populations under the local adaptation model and further work is  
637 needed to characterize the local fitness environments in ecological niches

638 The data presented here supports the hypothesis that the size of the inversion may be an  
639 indirectly selected character (Caceres, Barbadilla, & Ruiz, 1997, 1999). The ST arrangement is  
640 an exceptional case because the majority of the candidate selected genes are outside of the  
641 original derived inversion (HY to ST) and instead found in the proximal region, which overlaps  
642 with the AR inversion. Because ST gave rise to AR and AR remained in populations with ST, it  
643 appears that new adaptive genes in ST have become fixed from standing variation after the HY

644 to ST inversion event. We hypothesize this resulted from selection on standing variation within  
645 ST (Wyatt W. Anderson et al., 1991; Dobzhansky, 1944) and suppression of recombination due  
646 to the presence of AR and CH in populations with ST. Thus, our data suggest that an initial  
647 inversion event can lock up adaptive combinations of genes within the inverted segment, but  
648 additional multi-locus combinations can be established outside of the initial inversion  
649 breakpoints based on what other arrangements are present in the population.

650         If double cross overs are responsible for breaking up LD, one would expect larger regions  
651 of sharing between arrangements (Arcadio Navarro et al., 1997), especially between ST and PP.  
652 The ST to PP inversion corresponds to 52% of the length of the third chromosome and one  
653 would expect seven percent of gametes from a ST/PP heterozygote to produce double cross overs  
654 leading to more similarity within their inverted regions. Homogenization, however, is unlikely  
655 because ST and PP do not co-occur at appreciable frequencies in nature. Wallace (1953)  
656 proposed the triad model where coadapted gene complexes could be eroded when sets of  
657 arrangements separated by single inversion steps such as AR-ST-PP are present in the same  
658 population. Therefore, it is reasonable to speculate that all members of a triad do not co-occur  
659 for this reason. ST and PP support the triad model because of the non-trivial potential to  
660 generate maladaptive recombinant haplotypes.

661         There is a significant enrichment of genes involved in sensory perception and odorant  
662 binding showing evidence of adaptive evolution. Analyses of insect genomes have found that  
663 odorant perception and detoxification proteins are typically found to be amplified in copy  
664 numbers and show evidence of recent positive selection (Chen et al., 2015; Nene et al., 2007;  
665 Scott et al., 2014; Smadja, Shi, Butlin, & Robertson, 2009; The Honeybee Genome Sequencing  
666 Consortium, 2006; The International Aphid Genomics Consortium, 2010; Tribolium Genome

667 Sequencing Consortium, 2008; You et al., 2013). Our study further suggests these genes may be  
668 targets of selection in insect species because they can play a role in adapting to complex  
669 environments. Furthermore, several of the genes showing evidence of adaptive evolution are  
670 members of the limonene and pinene degradation pathway. It is intriguing to speculate that  
671 ponderosa pine is part of the ecology of *D. pseudoobscura* either because the adults are  
672 associated with bark of the tree or larvae feed on the pine nuts.

673         The establishment of inversion clines may play a role in the speciation process. In such a  
674 system, the emergence of Dobzhansky-Muller incompatibility genes within one arrangement  
675 background can easily spread within the inversion type, but not to other chromosomal  
676 backgrounds (A. Navarro & Barton, 2003). This may have been how *D. persimilis* was formed  
677 (Noor, Grams, Bertucci, & Reiland, 2001). The distribution of *D. persimilis* is sympatric with *D.*  
678 *pseudoobscura* and the two species differ by several fixed inversion differences that include  
679 reproductive isolation genes. Thus, *D. pseudoobscura* may be ripe for additional speciation  
680 events.

681         The evolution of different gene arrangements in *D. pseudoobscura* may be in response to  
682 life history and environmental challenges that require many genes of small effect to adapt to a  
683 heterogeneous environment. Independent assortment and recombination play a vital role in  
684 helping an organism to generate multiple combinations for selection to sift through. While this is  
685 an advantage, it is also a curse because adaptive combinations of genes can be split apart as  
686 quickly as they are made. In this system, it seems that chromosomal inversions help to hold  
687 adaptive combinations together.

688 **Acknowledgements**

689 Ian S. Leopold for preparation of polytene chromosome squashes, digital photography of  
690 the chromosomes, and assembly of the mosaic images of the chromosomes. Andre G. Wallace  
691 for sequencing the 18 regions used to validate the Illumina sequences. Richard Kliman at Cedar  
692 Crest College who kindly provided the SNP data for the *D. pseudoobscura* second chromosome.  
693 The authors would like to thank the staff at the Baylor College of Medicine Human Genome  
694 Sequencing Center for their technical and computational contributions. This work was supported  
695 by a grant from the National Institute for General Medical Sciences at the National Institutes of  
696 Health R01 GM098478 to S.W.S. and the Penn State-National Institutes of Health funded  
697 Computation, Bioinformatics and Statistics (CBIOS) Predoctoral Training Program to Z.L.F.

698 **References**

- 699  
700 Anderson, A. R., Hoffmann, A. A., McKechnie, S. W., Umina, P. A., & Weeks, A. R. (2005).  
701 The latitudinal cline in the *In(3R)Payne* inversion polymorphism has shifted in the last 20  
702 years in Australian *Drosophila melanogaster* populations. *Mol Ecol*, *14*(3), 851-858.  
703 Anderson, W. W., Arnold, J., Baldwin, D. G., Beckenbach, A. T., Brown, C. J., Bryant, S. H., . .  
704 . Moore, J. A. (1991). Four decades of inversion polymorphism in *Drosophila*  
705 *pseudoobscura*. *Proceedings of the National Academy of Sciences USA*, *88*, 10367-  
706 10371.  
707 Anderson, W. W., Ayala, F. J., & Michod, R. E. (1977). Chromosomal and allozymic diagnosis  
708 of three species of *Drosophila*, *Drosophila pseudoobscura*, *Drosophila persimilis*, and  
709 *Drosophila miranda*. *Journal of Heredity*, *68*, 71-74.  
710 Anderson, W. W., Dobzhansky, T., & Kastritsis, C. D. (1967). Selection and inversion  
711 polymorphism in experimental populations of *Drosophila pseudoobscura* initiated with  
712 the chromosomal constitutions of natural populations. *Evolution*, *21*, 664-671.  
713 Aquadro, C. F., Weaver, A. L., Schaeffer, S. W., & Anderson, W. W. (1991). Molecular  
714 evolution of inversions in *Drosophila pseudoobscura* : The amylase gene region.  
715 *Proceedings of the National Academy of Sciences USA*, *88*, 305-309.  
716 Arya, G. H., Magwire, M. M., Huang, W., Serrano-Negron, Y. L., Mackay, T. F. C., & Anholt,  
717 R. R. H. (2015). The genetic basis for variation in olfactory behavior in *Drosophila*  
718 *melanogaster*. *Chemical Senses*, *40*(4), 233-243.  
719 Ayala, D., Acevedo, P., Pombi, M., Dia, I., Boccolini, D., Costantini, C., . . . Fontenille, D.  
720 (2017). Chromosome inversions and ecological plasticity in the main African malaria  
721 mosquitoes. *Evolution*, *71*(3), 686-701.  
722 Ayala, D., Fontaine, M. C., Cohuet, A., Fontenille, D., Vitalis, R., & Simard, F. (2011).  
723 Chromosomal inversions, natural selection and adaptation in the malaria vector  
724 *Anopheles funestus*. *Mol Biol Evol*, *28*(1), 745-758.  
725 Balanya, J., Serra, L., Gilchrist, G. W., Huey, R. B., Pascual, M., Mestres, F., & Sole, E. (2003).  
726 Evolutionary pace of chromosomal polymorphism in colonizing populations of  
727 *Drosophila subobscura*: an evolutionary time series. *Evolution*, *57*(8), 1837-1845.



- 728 Becks, L., & Agrawal, A. F. (2010). Higher rates of sex evolve in spatially heterogeneous  
729 environments. *Nature*, 468(7320), 89-92.
- 730 Becks, L., & Agrawal, A. F. (2012). The evolution of sex is favoured during adaptation to new  
731 environments. *PLoS Biol*, 10(5), e1001317.
- 732 Bhutkar, A., Schaeffer, S. W., Russo, S., Xu, M., Smith, T. F., & Gelbart, W. M. (2008).  
733 Chromosomal rearrangement inferred from comparisons of twelve *Drosophila* genomes.  
734 *Genetics*, 179, 1657-1680.
- 735 Caceres, M., Barbadilla, A., & Ruiz, A. (1997). Inversion length and breakpoint distribution in  
736 the *Drosophila buzzatii* species complex: Is inversion length a selected trait? *Evolution*,  
737 51(4), 1149-1155.
- 738 Caceres, M., Barbadilla, A., & Ruiz, A. (1999). Recombination rate predicts inversion size in  
739 Diptera. *Genetics*, 153(1), 251-259.
- 740 Calboli, F. C., Kennington, W. J., & Partridge, L. (2003). QTL mapping reveals a striking  
741 coincidence in the positions of genomic regions associated with adaptive variation in  
742 body size in parallel clines of *Drosophila melanogaster* on different continents.  
743 *Evolution*, 57(11), 2653-2658.
- 744 Calvete, O., Gonzalez, J., Betran, E., & Ruiz, A. (2012). Segmental duplication, microinversion,  
745 and gene loss associated with a complex inversion breakpoint region in *Drosophila*. *Mol*  
746 *Biol Evol*, 29(7), 1875-1889.
- 747 Carbone, L., Harris, R. A., Gnerre, S., Veeramah, K. R., Lorente-Galdos, B., Huddleston, J., . . .  
748 Gibbs, R. A. (2014). Gibbon genome and the fast karyotype evolution of small apes.  
749 *Nature*, 513(7517), 195-201.
- 750 Carson, H. L. (1992). Inversions in Hawaiian *Drosophila*. In C. Krimbas & J. R. Powell (Eds.),  
751 *Drosophila Inversion Polymorphism* (pp. 407-439). Boca Raton, FL: CRC Press.
- 752 Charlesworth, B., & Charlesworth, D. (1973). Selection of new inversion in multi-locus genetic  
753 systems. *Genetical Research*, 21(2), 167-183.
- 754 Chen, X.-G., Jiang, X., Gu, J., Xu, M., Wu, Y., Deng, Y., . . . James, A. A. (2015). Genome  
755 sequence of the Asian tiger mosquito, *Aedes albopictus*, reveals insights into its biology,  
756 genetics, and evolution. *Proceedings of the National Academy of Sciences*, 112(44),  
757 E5907-E5915.
- 758 Cheng, C., White, B. J., Kamdem, C., Mockaitis, K., Costantini, C., Hahn, M. W., & Besansky,  
759 N. J. (2012). Ecological genomics of *Anopheles gambiae* along a latitudinal cline: A  
760 population-resequencing approach. *Genetics*, 190(4), 1417-1432.
- 761 Coluzzi, M., Sabatini, A., della Torre, A., Di Deco, M. A., & Petrarca, V. (2002). A polytene  
762 chromosome analysis of the *Anopheles gambiae* species complex. *Science*, 298(5597),  
763 1415-1418.
- 764 Coluzzi, M., Sabatini, A., Petrarca, V., & Di Deco, M. A. (1979). Chromosomal differentiation  
765 and adaptation to human environments in the *dob* complex. *Transactions of The Royal*  
766 *Society of Tropical Medicine and Hygiene*, 73(5), 483-497.
- 767 Corbett-Detig, R. B. (2016). Selection on inversion breakpoints favors proximity to pairing  
768 sensitive sites in *Drosophila melanogaster*. *Genetics*, 204(1), 259-265.
- 769 Corbett-Detig, R. B., Cardeno, C., & Langley, C. H. (2012). Sequence-based detection and  
770 breakpoint assembly of polymorphic inversions. *Genetics*, 192(1), 131-137.
- 771 Coyne, J. A., Bryant, S. H., & Turelli, M. (1987). Long-distance migration of *Drosophila*. 2.  
772 Presence in desolate sites and dispersal near a desert oasis. *American Naturalist*, 129,  
773 847-861.

- 774 Cridland, J. M., & Thornton, K. R. (2010). Validation of rearrangement break points identified  
775 by paired-end sequencing in natural populations of *Drosophila melanogaster*. *Genome*  
776 *Biol Evol*, 2, 83-101.
- 777 DePristo, M. A., Banks, E., Poplin, R., Garimella, K. V., Maguire, J. R., Hartl, C., . . . Daly, M.  
778 J. (2011). A framework for variation discovery and genotyping using next-generation  
779 DNA sequencing data. *Nat Genet*, 43(5), 491-498.
- 780 Dobigny, G., Britton-Davidian, J., & Robinson, T. J. (2015). Chromosomal polymorphism in  
781 mammals: an evolutionary perspective. *Biological Reviews*, 92, 1-21.
- 782 Dobzhansky, T. (1943). Genetics of natural populations. IX. Temporal changes in the  
783 composition of populations of *Drosophila pseudoobscura*. *Genetics*, 28, 162-186.
- 784 Dobzhansky, T. (1944). Chromosomal races in *Drosophila pseudoobscura* and *Drosophila*  
785 *persimilis*. *Carnegie Inst. Washington Publ.*, 554, 47-144.
- 786 Dobzhansky, T. (1948a). Genetics of natural populations. XVI. Altitudinal and seasonal changes  
787 in certain populations of *Drosophila pseudoobscura* and *Drosophila persimilis*. *Genetics*,  
788 33, 158-176.
- 789 Dobzhansky, T. (1948b). Genetics of natural populations. XVIII. Experiments on chromosomes  
790 of *Drosophila pseudoobscura* from different geographic regions. *Genetics*, 33, 588-602.
- 791 Dobzhansky, T. (1950). The genetics of natural populations. XIX. Origin of heterosis through  
792 natural selection in populations of *Drosophila pseudoobscura*. *Genetics*, 35, 288-302.
- 793 Dobzhansky, T., & Sturtevant, A. H. (1938). Inversions in the chromosomes of *Drosophila*  
794 *pseudoobscura*. *Genetics*, 23, 28-64.
- 795 dos Santos, G., Schroeder, A. J., Goodman, J. L., Strelets, V. B., Crosby, M. A., Thurmond, J., . . .  
796 . Consortium, t. F. (2015). FlyBase: Introduction of the *Drosophila melanogaster* Release  
797 6 reference genome assembly and large-scale migration of genome annotations. *Nucleic*  
798 *Acids Research*, 43(D1), D690-D697.
- 799 Engelbrecht, A., Taylor, P. J., Daniels, S. R., & Rambau, R. V. (2011). Chromosomal  
800 polymorphisms in African Vlei Rats, *Otomys irroratus* (Muridae: Otomyini), detected by  
801 banding techniques and chromosome painting: inversions, centromeric shifts and diploid  
802 number variation. *Cytogenetic and Genome Research*, 133(1), 8-15.
- 803 Felsenstein, J. (1985). Confidence limits on phylogenies: An approach using the bootstrap.  
804 *Evolution*, 39, 783-791.
- 805 Fontaine, M. C., Pease, J. B., Steele, A., Waterhouse, R. M., Neafsey, D. E., Sharakhov, I. V., . . .  
806 . Besansky, N. J. (2015). Extensive introgression in a malaria vector species complex  
807 revealed by phylogenomics. *Science*, 347(6217).
- 808 Fuller, Z. L., Haynes, G. D., Richards, S., & Schaeffer, S. W. (2016). Genomics of natural  
809 populations: How differentially expressed genes shape the evolution of chromosomal  
810 inversions in *Drosophila pseudoobscura*. *Genetics*, 204, 287-301.
- 811 Fuller, Z. L., Haynes, G. D., Zhu, D., Batterton, M., Chao, H., Dugan, S., . . . Schaeffer, S. W.  
812 (2014). Evidence for stabilizing selection on codon usage in chromosomal  
813 rearrangements of *Drosophila pseudoobscura*. *G3: Genes/Genomes/Genetics*, 4(12),  
814 2433-2449.
- 815 Garrison, E., & Marth, G. (2012). Haplotype-based variant detection from short-read sequencing.  
816 *arXiv:1207.3907v2*.
- 817 Guillen, Y., & Ruiz, A. (2012). Gene alterations at *Drosophila* inversion breakpoints provide  
818 prima facie evidence for natural selection as an explanation for rapid chromosomal  
819 evolution. *BMC Genomics*, 13, 53.

- 820 Hahn, M. W., Rausher, M. D., & Cunningham, C. W. (2002). Distinguishing between selection  
821 and population expansion in an experimental lineage of bacteriophage T7. *Genetics*,  
822 *161*(1), 11-20.
- 823 Hartl, D. L., & Clark, A. G. (1997). *Principles of Population Genetics*. Sunderland, MA:  
824 Sinauer Associates, Inc.
- 825 Hill, W. G., & Robertson, A. (1968). Linkage disequilibrium in finite populations. *Theoretical*  
826 *and Applied Genetics*, *38*, 226-231.
- 827 Hintze, J. L., & Nelson, R. D. (1998). Violin plots: A box plot-density trace synergism. *The*  
828 *American Statistician*, *52*(2), 181-184.
- 829 Hoffmann, A. A., & Rieseberg, L. H. (2008). Revisiting the impact of inversions in evolution:  
830 From population genetic markers to drivers of adaptive shifts and speciation? *Annual*  
831 *Review of Ecology and Systematics*, *39*, 21-42.
- 832 Hou, C., Li, L., Qin, Zhaohui S., & Corces, Victor G. (2012). Gene density, transcription, and  
833 insulators contribute to the partition of the *Drosophila* genome into physical domains.  
834 *Molecular Cell*, *48*(3), 471-484.
- 835 Huang, D. W., Sherman, B. T., & Lempicki, R. A. (2009a). Bioinformatics enrichment tools:  
836 paths toward the comprehensive functional analysis of large gene lists. *Nucleic Acids*  
837 *Research*, *37*(1), 1-13.
- 838 Huang, D. W., Sherman, B. T., & Lempicki, R. A. (2009b). Systematic and integrative analysis  
839 of large gene lists using DAVID bioinformatics resources. *Nat. Protocols*, *4*(1), 44-57.
- 840 Hudson, R. R., & Kaplan, N. L. (1986). On the divergence of alleles in nested subsamples from  
841 finite populations. *Genetics*, *113*, 1057-1076.
- 842 Huerta-Sanchez, E., Degiorgio, M., Pagani, L., Tarekegn, A., Ekong, R., Antao, T., . . . Nielsen,  
843 R. (2013). Genetic signatures reveal high-altitude adaptation in a set of ethiopian  
844 populations. *Mol Biol Evol*, *30*(8), 1877-1888.
- 845 Kapun, M., Fabian, D. K., Goudet, J., & Flatt, T. (2016). Genomic evidence for adaptive  
846 inversion clines in *Drosophila melanogaster*. *Molecular Biology and Evolution*, *33*(5),  
847 1317-1336.
- 848 Kapun, M., Schmidt, C., Durmaz, E., Schmidt, P. S., & Flatt, T. (2016). Parallel effects of the  
849 inversion *In(3R)Payne* on body size across the North American and Australian clines in  
850 *Drosophila melanogaster*. *Journal of Evolutionary Biology*, *29*, 1059-1072.
- 851 Kapun, M., van Schalkwyk, H., McAllister, B., Flatt, T., & Schlotterer, C. (2014). Inference of  
852 chromosomal inversion dynamics from Pool-Seq data in natural and laboratory  
853 populations of *Drosophila melanogaster*. *Mol Ecol*, *23*(7), 1813-1827.
- 854 Kennington, W. J., Partridge, L., & Hoffmann, A. A. (2006). Patterns of diversity and linkage  
855 disequilibrium within the cosmopolitan inversion *In(3R)Payne* in *Drosophila*  
856 *melanogaster* are indicative of coadaptation. *Genetics*, *172*(3), 1655-1663.
- 857 Kimura, M., & Ohta, T. (1973). The age of a neutral mutant persisting in a finite population.  
858 *Genetics*, *75*, 199-212.
- 859 Kirkpatrick, M., & Barton, N. (2006). Chromosome inversions, local adaptation and speciation.  
860 *Genetics*, *173*(1), 419-434.
- 861 Knibb, W. R. (1982). Chromosome inversion polymorphisms in *Drosophila melanogaster* II.  
862 Geographic clines and climatic associations in Australasia, North America and Asia.  
863 *Genetica*, *58*(3), 213-221.

- 864 Knibb, W. R., Oakeshott, J. G., & Gibson, J. B. (1981). Chromosome inversion polymorphisms  
865 in *Drosophila melanogaster*. I. Latitudinal clines and associations between inversions in  
866 Australasian populations. *Genetics*, 98(4), 833-847.
- 867 Kolaczowski, B., Kern, A. D., Holloway, A. K., & Begun, D. J. (2011). Genomic  
868 differentiation between temperate and tropical Australian populations of *Drosophila*  
869 *melanogaster*. *Genetics*, 187(1), 245-260.
- 870 Kovacevic, M., & Schaeffer, S. W. (2000). Molecular population genetics of X-linked genes in  
871 *Drosophila pseudoobscura*. *Genetics*, 156, 155-172.
- 872 Kupper, C., Stocks, M., Risse, J. E., dos Remedios, N., Farrell, L. L., McRae, S. B., . . . Burke,  
873 T. (2016). A supergene determines highly divergent male reproductive morphs in the  
874 ruff. *Nat Genet*, 48(1), 79-83.
- 875 Lande, R. (1984). The expected fixation rate of chromosomal inversions. *Evolution*, 38, 743-752.
- 876 Langley, C. H., Stevens, K., Cardeno, C., Lee, Y. C. G., Schrider, D. R., Pool, J. E., . . . Begun,  
877 D. J. (2012). Genomic variation in natural populations of *Drosophila melanogaster*.  
878 *Genetics*, 192(2), 533-598.
- 879 Lee, Y. W., Fishman, L., Kelly, J. K., & Willis, J. H. (2016). Fitness Variation Is Generated by a  
880 Segregating Inversion in Yellow Monkeyflower (*Mimulus guttatus*). *Genetics*.
- 881 Levitan, M. (1992). The inversion polymorphism of *Drosophila robusta*. In C. B. Krimbas (Ed.),  
882 *Drosophila Inversion Polymorphism* (pp. 221-338). Boca Raton: CRC Press.
- 883 Li, H., & Durbin, R. (2009). Fast and accurate short read alignment with Burrows-Wheeler  
884 transform. *Bioinformatics*, 25(14), 1754-1760.
- 885 Li, H., Handsaker, B., Wysoker, A., Fennell, T., Ruan, J., Homer, N., . . . Subgroup, G. P. D. P.  
886 (2009). The sequence alignment/map format and SAMtools. *Bioinformatics*, 25(16),  
887 2078-2079.
- 888 Lobeck, A. K. (Cartographer). (1948). Physiographic diagram of North America
- 889 Mackay, T. F. C., Richards, S., Stone, E. A., Barbadilla, A., Ayroles, J. F., Zhu, D., . . . Gibbs, R.  
890 A. (2012). The *Drosophila melanogaster* genetic reference panel. *Nature*, 482(7384),  
891 173-178.
- 892 Maynard Smith, J., & Haigh, J. (1974). The hitch-hiking effect of a favorable gene. *Genetical*  
893 *Research*, 23, 23-35.
- 894 McAllister, B. F., Sheeley, S. L., Mena, P. A., Evans, A. L., & Schlotterer, C. (2008). Clinal  
895 distribution of a chromosomal rearrangement: A precursor to chromosomal speciation?  
896 *Evolution*, 62(8), 1852-1865.
- 897 McDonald, M. J., Rice, D. P., & Desai, M. M. (2016). Sex speeds adaptation by altering the  
898 dynamics of molecular evolution. *Nature*, 531(7593), 233-236.
- 899 McGaugh, S. E., Heil, C. S. S., Manzano-Winkler, B., Loewe, L., Goldstein, S., Himmel, T. L.,  
900 & Noor, M. A. F. (2012). Recombination modulates how selection affects linked sites in  
901 *Drosophila*. *PLoS Biol*, 10(11), e1001422.
- 902 McGraw, L. A., Davis, J. K., Young, L. J., & Thomas, J. W. (2011). A genetic linkage map and  
903 comparative mapping of the prairie vole (*Microtus ochrogaster*) genome. *BMC Genetics*,  
904 12(1), 1-10.
- 905 McKenna, A., Hanna, M., Banks, E., Sivachenko, A., Cibulskis, K., Kernytsky, A., . . . DePristo,  
906 M. A. (2010). The genome analysis toolkit: a MapReduce framework for analyzing next-  
907 generation DNA sequencing data. *Genome Res*, 20(9), 1297-1303.
- 908 Mettler, L. E., Voelker, R. A., & Mukai, T. (1977). Inversion clines in populations of *Drosophila*  
909 *melanogaster*. *Genetics*, 87, 169-176.

- 910 Miller, D. E., Cook, K. R., Yeganeh Kazemi, N., Smith, C. B., Cockrell, A. J., Hawley, R. S., &  
911 Bergman, C. M. (2016). Rare recombination events generate sequence diversity among  
912 balancer chromosomes in *Drosophila melanogaster*. *Proceedings of the National*  
913 *Academy of Sciences*, *113*(10), E1352-E1361.
- 914 Muller, H. J. (1940). Bearings of the 'Drosophila' work on systematics. In J. Huxley (Ed.), *The*  
915 *New Systematics* (pp. 185-268). Oxford: Clarendon Press.
- 916 Nachman, M. W., Boyer, S. N., Searle, J. B., & Aquadro, C. F. (1994). Mitochondrial DNA  
917 variation and the evolution of Robertsonian chromosomal races of house mice, *Mus*  
918 *domesticus*. *Genetics*, *136*(3), 1105-1120.
- 919 Navarro, A., Barbadilla, A., & Ruiz, A. (2000). Effect of inversion polymorphism on the neutral  
920 nucleotide variability of linked chromosomal regions in *Drosophila*. *Genetics*, *155*, 685-  
921 698.
- 922 Navarro, A., & Barton, N. H. (2003). Accumulating postzygotic isolation genes in parapatry: a  
923 new twist on chromosomal speciation. *Evolution*, *57*(3), 447-459.
- 924 Navarro, A., Betrán, E., Barbadilla, A., & Ruiz, A. (1997). Recombination and gene flux caused  
925 by gene conversion and crossing over in inversion heterokaryotypes. *Genetics*, *146*, 695-  
926 709.
- 927 Nei, M., Kojima, K.-I., & Schaffer, H. E. (1967). Frequency changes of new inversions in  
928 populations under mutation-selection equilibria. *Genetics*, *57*, 741-750.
- 929 Nene, V., Wortman, J. R., Lawson, D., Haas, B., Kodira, C., Tu, Z. J., . . . Severson, D. W.  
930 (2007). Genome sequence of *Aedes aegypti*, a major arbovirus vector. *Science*,  
931 *316*(5832), 1718-1723.
- 932 Nishikawa, H., Iijima, T., Kajitani, R., Yamaguchi, J., Ando, T., Suzuki, Y., . . . Fujiwara, H.  
933 (2015). A genetic mechanism for female-limited Batesian mimicry in Papilio butterfly.  
934 *Nat Genet*, *47*(4), 405-409.
- 935 Noor, M. A., Grams, K. L., Bertucci, L. A., & Reiland, J. (2001). Chromosomal inversions and  
936 the reproductive isolation of species. *Proceedings of the National Academy of Sciences*  
937 *USA*, *98*(21), 12084-12088.
- 938 Novitski, E. (1951). Non-random disjunction in *Drosophila*. *Genetics*, *36*, 267-280.
- 939 Novitski, E. (1967). Nonrandom disjunction in *Drosophila*. *Annual Review of Genetics*, *1*, 71-86.
- 940 O'Neill, R. J., Eldridge, M. D., & Metcalfe, C. J. (2004). Centromere dynamics and chromosome  
941 evolution in marsupials. *J Hered*, *95*(5), 375-381.
- 942 O'Neill, R. J., Eldridge, M. D., Toder, R., Ferguson-Smith, M. A., O'Brien, P. C., & Graves, J. A.  
943 (1999). Chromosome evolution in kangaroos (Marsupialia: Macropodidae): cross species  
944 chromosome painting between the tammar wallaby and rock wallaby spp. with the  $2n =$   
945  $22$  ancestral macropodid karyotype. *Genome*, *42*(3), 525-530.
- 946 Ohta, T. (1971). Associative overdominance caused by linked deleterious mutations. *Genetical*  
947 *Research*, *18*, 227-286.
- 948 Otto, S. P., & Lenormand, T. (2002). Resolving the paradox of sex and recombination. *Nat Rev*  
949 *Genet*, *3*(4), 252-261.
- 950 Papaceit, M., Segarra, C., & Aguadé, M. (2013). Structure and population genetics of the  
951 breakpoints of a polymorphic inversion in *Drosophila subobscura*. *Evolution*, *67*(1), 66-  
952 79.
- 953 Peischl, S., Koch, E., Guerrero, R. F., & Kirkpatrick, M. (2013). A sequential coalescent  
954 algorithm for chromosomal inversions. *Heredity*.

- 955 Pettenati, M. J., Rao, P. N., Phelan, M. C., Grass, F., Rao, K. W., Cospes, P., . . . Palmer, C. G.  
956 (1995). Paracentric inversions in humans: a review of 446 paracentric inversions with  
957 presentation of 120 new cases. *American Journal of Medical Genetics*, 55(2), 171-187.
- 958 Powell, J. R. (1992). Inversion polymorphisms in *Drosophila pseudoobscura* and *Drosophila*  
959 *persimilis*. In C. B. Krimbas & J. R. Powell (Eds.), *Drosophila Inversion Polymorphism*  
960 (pp. 73-126). Ann Arbor, MI: CRC Press.
- 961 Prakash, S., & Lewontin, R. C. (1968). A molecular approach to the study of genic  
962 heterozygosity in natural populations, III. Direct evidence of coadaptation in gene  
963 arrangements of *Drosophila*. *Proceedings of the National Academy of Sciences USA*, 59,  
964 398-405.
- 965 Prakash, S., & Lewontin, R. C. (1971). A molecular approach to the study of genic  
966 heterozygosity in natural populations. V. Further direct evidence of coadaptation in  
967 inversions of *Drosophila*. *Genetics*, 69, 405-408.
- 968 Puerma, E., Orengo, D. J., Salguero, D., Papaceit, M., Segarra, C., & Aguadé, M. (2014).  
969 Characterization of the breakpoints of a polymorphic inversion complex detects strict and  
970 broad breakpoint reuse at the molecular level. *Molecular Biology and Evolution*, 31(9),  
971 2331-2341.
- 972 Pyhäjärvi, T., Hufford, M. B., Mezouk, S., & Ross-Ibarra, J. (2013). Complex patterns of local  
973 adaptation in Teosinte. *Genome Biology and Evolution*, 5(9), 1594-1609.
- 974 Ranz, J. M., Maurin, D., Chan, Y. S., Grotthuss, M. v., Hillier, L. W., Roote, J., . . . Bergman, C.  
975 M. (2007). Principles of genome evolution in the *Drosophila melanogaster* species group  
976 *Public Library of Science Biology*, 5, 1366-1381.
- 977 Richards, S., Liu, Y., Bettencourt, B. R., Hradecky, P., Letovsky, S., Nielsen, R., . . . Gibbs, R.  
978 A. (2005). Comparative genome sequencing of *Drosophila pseudoobscura*:  
979 Chromosomal, gene and *cis*-element evolution. *Genome Research*, 15, 1-18.
- 980 Riley, M. A., Hallas, M. E., & Lewontin, R. C. (1989). Distinguishing the forces controlling  
981 genetic variation at the *Xdh* locus in *Drosophila pseudoobscura*. *Genetics*, 123, 359-369.
- 982 Saitou, N., & Nei, M. (1987). The neighbor-joining method: A new method for reconstructing  
983 phylogenetic trees. *Molecular Biology and Evolution*, 4, 406-425.
- 984 Salceda, V. M., Guzman-Rincon, J., Rosa, M. E. d. l., & Olvera, O. (2015). Four decades of  
985 inversion polymorphism in *Drosophila pseudoobscura* from Mexico. *Genetika*, 47(3),  
986 959-966.
- 987 Santos, J., Pascual, M., Fragata, I., Simões, P., Santos, M. A., Lima, M., . . . Matos, M. (2016).  
988 Tracking changes in chromosomal arrangements and their genetic content during  
989 adaptation. *Journal of Evolutionary Biology*, 29, 1151-1167.
- 990 Santos, M., Cespedes, W., Balanya, J., Trotta, V., Calboli, F. C., Fontdevila, A., & Serra, L.  
991 (2005). Temperature-related genetic changes in laboratory populations of *Drosophila*  
992 *subobscura*: evidence against simple climatic-based explanations for latitudinal clines.  
993 *Am Nat*, 165(2), 258-273.
- 994 Schaeffer, S. W. (2002). Molecular population genetics of sequence length diversity in the *Adh*  
995 region of *Drosophila pseudoobscura*. *Genetical Research*, 80, 163-175.
- 996 Schaeffer, S. W. (2008). Selection in heterogeneous environments maintains the gene  
997 arrangement polymorphism of *Drosophila pseudoobscura*. *Evolution*, 62, 3082-3099.
- 998 Schaeffer, S. W., & Anderson, W. W. (2005). Mechanisms of genetic exchange within the  
999 chromosomal inversions of *Drosophila pseudoobscura*. *Genetics*, 171, 1729-1739.

- 1000 Schaeffer, S. W., Bhutkar, A., McAllister, B. F., Matsuda, M., Matzkin, L. M., Grady, P. M. O., .  
1001 . . Kaufman, T. C. (2008). Polytene chromosomal maps of 11 *Drosophila* species: The  
1002 order of genomic scaffolds inferred from genetic and physical maps. *Genetics*, *179*, 1601-  
1003 1655.
- 1004 Schaeffer, S. W., Goetting-Minesky, P., Kovacevic, M., Peoples, J., Graybill, J. L., Miller, J. M.,  
1005 . . . Anderson, W. W. (2003). Evolutionary genomics of inversions in *Drosophila*  
1006 *pseudoobscura*: Evidence for epistasis. *Proceedings of the National Academy of Sciences*  
1007 *USA*, *100*, 8319-8324.
- 1008 Schaeffer, S. W., & Miller, E. L. (1992). Estimates of gene flow in *Drosophila pseudoobscura*  
1009 determined from nucleotide sequence analysis of the alcohol dehydrogenase region.  
1010 *Genetics*, *132*, 471-480.
- 1011 Scott, J. G., Warren, W. C., Beukeboom, L. W., Bopp, D., Clark, A. G., Giers, S. D., . . . Liu, N.  
1012 (2014). Genome of the house fly, *Musca domestica* L., a global vector of diseases with  
1013 adaptations to a septic environment. *Genome Biology*, *15*(10), 1-17.
- 1014 Shriver, M., Kennedy, G., Parra, E., Lawson, H., Sonpar, V., Huang, J., . . . Jones, K. (2004).  
1015 The genomic distribution of population substructure in four populations using 8,525  
1016 autosomal SNPs. *Human Genomics*, *1*(4), 274 - 286.
- 1017 Silva, M., Ribeiro, E. D., Matoso, D. A., Sousa, L. M., Hrbek, T., Py-Daniel, L. R., & Feldberg,  
1018 E. (2014). Chromosomal polymorphism in two species of Hypancistrus (Siluriformes:  
1019 Loricariidae): an integrative approach for understanding their biodiversity. *Genetica*,  
1020 *142*(2), 127-139.
- 1021 Smadja, C., Shi, P., Butlin, R. K., & Robertson, H. M. (2009). Large gene family expansions and  
1022 adaptive evolution for odorant and gustatory receptors in the pea aphid, *Acyrtosiphon*  
1023 *pisum*. *Mol Biol Evol*, *26*(9), 2073-2086.
- 1024 Smith, R. H. (1977). *Monoterpenes of Ponderosa Pine Xylem Resin in Western United States*:  
1025 USDA Forest Service Technical Bulletin 1532.
- 1026 Soto, I. M., Soto, E. M., Carreira, V. P., Hurtado, J., Fanara, J. J., & Hasson, E. (2010).  
1027 Geographic patterns of inversion polymorphism in the second chromosome of the  
1028 cactophilic *Drosophila buzzatii* from northeastern Argentina. *J Insect Sci*, *10*, 181.
- 1029 Sperlich, D. (1959). [Experimental contributions to the problem of the positive heterosis effect in  
1030 the structural polymorphous species *Drosophila subobscura*]. *Z Vererbungslehre*, *90*, 273-  
1031 287.
- 1032 Sperlich, D., & Pfriem, P. (1986). Chromosomal polymorphism in natural and experimental  
1033 populations. In M. Ashburner, H. L. Carson, & J. N. Thomson (Eds.), *The Genetics and*  
1034 *Biology of Drosophila 3e* (Vol. 3e, pp. 257-309). New York, NY: Academic Press.
- 1035 Stefansson, H., Helgason, A., Thorleifsson, G., Steinthorsdottir, V., Masson, G., Barnard, J., . . .  
1036 Stefansson, K. (2005). A common inversion under selection in Europeans. *Nature*  
1037 *Genetics*, *37*(2), 129-137.
- 1038 Storey, J. D. (2002). A direct approach to false discovery rates. *Journal of the Royal Statistical*  
1039 *Society, Series B*, *64*, 479-498.
- 1040 Storey, J. D. (2003). The positive false discovery rate: A Bayesian interpretation and the q-value.  
1041 *Annals of Statistics*, *31*, 2013-2035.
- 1042 Sturtevant, A. H. (1926). A crossover reducer in *Drosophila melanogaster* due to inversion of a  
1043 section of the third chromosome. *Biologische Zentralblatt*, *46*, 697-702.
- 1044 Sturtevant, A. H., & Beadle, G. W. (1936). The relations of inversions in the X chromosome of  
1045 *Drosophila melanogaster* to crossing over and disjunction. *Genetics*, *21*, 544-604.

- 1046 Tajima, F. (1989). Statistical method for testing the neutral mutation hypothesis by DNA  
1047 polymorphism. *Genetics*, *123*, 585-595.
- 1048 Tamura, K., Nei, M., & Kumar, S. (2004). Prospects for inferring very large phylogenies by  
1049 using the neighbor-joining method. *Proc Natl Acad Sci U S A*, *101*(30), 11030-11035.
- 1050 Tamura, K., Stecher, G., Peterson, D., Filipski, A., & Kumar, S. (2013). MEGA6: Molecular  
1051 Evolutionary Genetics Analysis Version 6.0. *Molecular Biology and Evolution*, *30*(12),  
1052 2725-2729.
- 1053 The Honeybee Genome Sequencing Consortium. (2006). Insights into social insects from the  
1054 genome of the honeybee *Apis mellifera*. *Nature*, *443*(7114), 931-949.
- 1055 The International Aphid Genomics Consortium. (2010). Genome Sequence of the Pea Aphid  
1056 *Acyrtosiphon pisum*. *PLoS Biol*, *8*(2), e1000313.
- 1057 Thoss, V., & Byers, J. A. (2006). Monoterpene chemodiversity of ponderosa pine in relation to  
1058 herbivory and bark beetle colonization. *CHEMOECOLOGY*, *16*(1), 51-58.
- 1059 Toomajian, C., Ajioka, R. S., Jorde, L. B., Kushner, J. P., & Kreitman, M. (2003). A method for  
1060 detecting recent selection in the human genome from allele age estimates. *Genetics*,  
1061 *165*(1), 287-297.
- 1062 Tribolium Genome Sequencing Consortium. (2008). The genome of the model beetle and pest  
1063 *Tribolium castaneum*. *Nature*, *452*(7190), 949-955.
- 1064 Wallace, A. G., Detweiler, D., & Schaeffer, S. W. (2011). Evolutionary history of the third  
1065 chromosome gene arrangements of *Drosophila pseudoobscura* inferred from inversion  
1066 breakpoints. *Molecular Biology and Evolution*, *28*, 2219-2229.
- 1067 Wallace, B. (1953). On coadaptation in *Drosophila*. *American Naturalist*, *87*, 343-358.
- 1068 Wang, Y., Lim, L., Madilao, L., Lah, L., Bohlmann, J., & Breuil, C. (2014). Gene discovery for  
1069 enzymes involved in limonene modification or utilization by the mountain pine beetle-  
1070 associated pathogen *Grosmannia clavigera*. *Appl Environ Microbiol*, *80*(15), 4566-4576.
- 1071 Wasserman, M. (1982). Evolution of the *repleta* group. In M. Ashburner, H. L. Carson, & J. N.  
1072 Thompson (Eds.), *The Genetics and Biology of Drosophila 3b* (Vol. 3b, pp. 61-139).  
1073 New York: Academic Press.
- 1074 Wright, S., & Dobzhansky, T. (1946). Genetics of natural populations. XII. Experimental  
1075 reproduction of some of the changes caused by natural selection in certain populations of  
1076 *Drosophila pseudoobscura*. *Genetics*, *31*, 125-156.
- 1077 Yi, X., Liang, Y., Huerta-Sanchez, E., Jin, X., Cuo, Z. X. P., Pool, J. E., . . . Wang, J. (2010).  
1078 Sequencing of 50 human exomes reveals adaptation to high altitude. *Science*, *329*(5987),  
1079 75-78.
- 1080 You, M., Yue, Z., He, W., Yang, X., Yang, G., Xie, M., . . . Wang, J. (2013). A heterozygous  
1081 moth genome provides insights into herbivory and detoxification. *Nat Genet*, *45*(2), 220-  
1082 225.
- 1083 Zaykin, D. V., Pudovkin, A., & Weir, B. S. (2008). Correlation-based inference for linkage  
1084 disequilibrium with multiple alleles. *Genetics*, *180*(1), 533-545.
- 1085 Zinzow-Kramer, W. M., Horton, B. M., McKee, C. D., Michaud, J. M., Tharp, G. K., Thomas, J.  
1086 W., . . . Maney, D. L. (2015). Genes located in a chromosomal inversion are correlated  
1087 with territorial song in white-throated sparrows. *Genes, Brain and Behavior*, *14*(8), 641-  
1088 654.

1089  
1090



1091 **Data Accessibility**

1092 DNA Sequences: NCBI SRA: SRX204748-SRX204792, SRX091323, SRX091311,  
1093 SRX815755, SRX2484948, SRX2484950, SRX2484953, SRX2484955, SRX2484969.  
1094 SNP table for the third chromosome containing the sites used for all subsequent analyses is  
1095 available through Scholarsphere (<https://scholarsphere.psu.edu>).  
1096 Computer Code is available: (<https://scholarsphere.psu.edu>)

1097 **Author Contributions**

1098 S.W.S conceived the project. S.R., generated the sequence data. Z.L.F., G.D.H., S.R. and S.W.S,  
1099 analyzed the data. Z.L.F., G.D.H., S.R., and S.W.S. wrote the manuscript.

1100

Table 1. Breakpoint map locations for seven inversion events in the MV 2-25 reference genome of *D. pseudoobscura*.

| Breakpoint | Cyto_Ref | 5'_Gene | 5'_Coor    | 3'_Gene | 3'_Coor    | BP_Interval            |
|------------|----------|---------|------------|---------|------------|------------------------|
| pSCCU      | 64B 64C  | GA17643 | 1,766,685  | GA24634 | 1,769,869  | 1,769,503..1769,545    |
| pSTPP      | 65B 65C  | GA13487 | 2,500,7218 | GA13475 | 2,505,628  | 2,504,717..2,505,525   |
| pHYSC      | 68B 68C  | GA21475 | 6,814,856  | GA19795 | 6,830,821  | 6,817,305..6,819,934   |
| dSCCU      | 69C 69D  | GA18750 | 8,021,189  | GA24813 | 8,027,622  | 8,026,967..8,027,480   |
| pSTAR      | 70A 76B  | GA24334 | 8,902,967  | GA19155 | 8,905,717  | 8,902,967..8,905,362   |
| dSTPP      | 76B 76A  | GA22082 | 9,162,365  | GA20777 | 9,164,720  | 9,163,072..9,164,670   |
| pHYST      | 76B 76A  | GA22082 | 9,162,375  | GA20777 | 9,164,720  | 9,163,072..9,164,057   |
| pSCTL      | 74C 74B  | GA19582 | 10,623,204 | GA14679 | 10,628,103 | 10,626,931..10,627,448 |
| pSCCH      | 70D 70C  | GA20939 | 13,940,052 | GA12507 | 13,941,493 | 13,940,125..13,941,042 |
| dSTAR      | 70B 76C  | GA17716 | 14,813,423 | GA17559 | 14,833,672 | 14,831,322..14,833,071 |
| dSCCH      | 78A 78B  | GA10355 | 15,653,239 | GA13882 | 15,658,703 | 15,657,098..15,657,203 |
| dSCTL      | 79B      | GA13539 | 17,149,432 | GA24132 | 17,153,461 | 17,151,554..17152,967  |
| dHYSC      | 79B 79C  | GA21720 | 17,545,780 | GA24111 | 17,567,890 | 17,545,438..17,545,671 |
| dHYST      | 79D 80A  | GA30270 | 17,725,786 | GA10842 | 17,729,964 | 17,727,100..17,727,669 |

Breakpoint, is the first letter indicates if the breakpoint is proximal (p) or distal (d), the second two letters indicates the ancestral gene arrangement and the last two letters indicates the derived gene arrangement. Cyto, is the location of the breakpoint in the AR reference genome. The location of the dSTPP breakpoints differ from the original location mapped in Dobzhansky and Sturtevant (1938). The original map location of dSTPP was 75C|76A. 5'\_Gene, the FlyBase annotation symbol of the gene 5' to the breakpoint. 5'\_Coor, the nucleotide coordinate of the last base of the 5'\_Gene. 3'\_Gene, the FlyBase annotation symbol of the gene 3' to the breakpoint. 3'\_Coor, the nucleotide coordinate of the first base of the 3'\_Gene. BP\_Interval, the coordinates of the breakpoint region in the AR reference sequence defined by mate pair reads spanning the inversion breakpoint. All coordinates are those of the AR reference genome (MV 2-25).

Table 2. Site frequency spectrum analysis based on gene arrangement and population categorical variables.

| Arr | Freq       | Number (%)      | Pop | Freq       | Number(%)       |
|-----|------------|-----------------|-----|------------|-----------------|
| AR  | 1          | 90,653 (23.56)  | MSH | 1          | 44,949 ( 9.80)  |
|     | 2-14       | 43,707 (11.36)  |     | 2-6        | 4,221 ( 0.92)   |
|     | 15 (Fixed) | 3,104 ( 0.81)   |     | 7 (Fixed)  | 0 ( 0.00)       |
|     | Shared     | 247,283 (64.27) |     | Shared     | 409,607 (89.28) |
|     | Total      | 384,747         |     | Total      | 458,777         |
| ST  | 1          | 36,586 (13.47)  | JR  | 1          | 72,751 (13.61)  |
|     | 2-7        | 24,037 ( 8.85)  |     | 2-13       | 26,021 ( 4.87)  |
|     | 8 (Fixed)  | 5,078 ( 1.87)   |     | 14 (Fixed) | 0 ( 0.00)       |
|     | Shared     | 205,925 (75.81) |     | Shared     | 435,818 (81.52) |
|     | Total      | 271,626         |     | Total      | 534,590         |
| PP  | 1          | 55,027 (16.87)  | KB  | 1          | 48,658 (12.87)  |
|     | 2-9        | 63,241 (19.39)  |     | 2-7        | 5,572 ( 1.47)   |
|     | 10 (Fixed) | 24,248 ( 7.43)  |     | 8 (Fixed)  | 0 ( 0.00)       |
|     | Shared     | 183,618 (56.30) |     | Shared     | 323,797 (85.65) |
|     | Total      | 326,134         |     | Total      | 378,027         |
| CH  | 1          | 48,840 (14.63)  | DM  | 1          | 73,274 (16.04)  |
|     | 2-8        | 42,354 (12.43)  |     | 2-11       | 36,166 ( 7.91)  |
|     | 9 (Fixed)  | 4,613 ( 1.35)   |     | 12 (Fixed) | 0 ( 0.00)       |
|     | Shared     | 243,856 (71.58) |     | Shared     | 347,499 (76.05) |
|     | Total      | 340,663         |     | Total      | 456,939         |
| TL  | 1          | 64,346 (17.94)  | SPE | 1          | 81,973 (19.77)  |
|     | 2-8        | 47,670 (13.29)  |     | 2-7        | 38,535 ( 9.29)  |
|     | 9 (Fixed)  | 8,856 ( 2.47)   |     | 8 (Fixed)  | 56 ( 0.01)      |
|     | Shared     | 237,703 (66.29) |     | Shared     | 294,144 (70.93) |
|     | Total      | 358,575         |     | Total      | 414,708         |
| CU  | 1          | 31,504 (13.67)  |     |            |                 |
|     | 2          | 9,554 ( 4.15)   |     |            |                 |
|     | 3 (Fixed)  | 7,995 ( 3.47)   |     |            |                 |
|     | Shared     | 181,351 (78.71) |     |            |                 |
|     | Total      | 230,404         |     |            |                 |

Arr, gene arrangement, AR, Arrowhead, ST, Standard, PP, Pikes Peak, CH, Chiricahua, TL, Tree Line, and CU, Cuernavaca; Freq, Frequency of the derived mutation within the arrangement or population; Pop, population; Number, number of SNP sites in the different frequency classes.

Table 3. Unique and Shared polymorphisms in proximal, inverted, and distal regions in six gene arrangements.

| Arrangement | Type   | Proximal<br>Obs (Exp) | Inverted<br>Obs (Exp) | Distal<br>Obs (Exp) |
|-------------|--------|-----------------------|-----------------------|---------------------|
| Arrowhead*  | Shared | 114,700 (104,926.2)   | 52,305 ( 67,343.1)    | 58,155 (52,890.6)   |
|             | Unique | 53,908 ( 63,681.8)    | 55,910 ( 40,871.9)    | 26,836 (32,100.4)   |
| Standard*   | Shared | 141,750 (143,519.3)   | 28,261 ( 28,761.2)    | 18,563 (16,293.5)   |
|             | Unique | 51,594 ( 49,824.7)    | 10,485 ( 9,984.8)     | 3,387 ( 5,656.5)    |
| Pikes Peak* | Shared | 14,064 ( 11,154.7)    | 96,036 (111,515.7)    | 53,828 (41,257.5)   |
|             | Unique | 6,696 ( 9,605.3)      | 111,505 ( 96,025.3)   | 22,956 (35,526.5)   |
| Chiricahua* | Shared | 141,777 (131,368.2)   | 49,533 ( 60,142.2)    | 31,078 (30,877.6)   |
|             | Unique | 46,509 ( 56,917.8)    | 36,667 ( 26,057.8)    | 13,178 (13,378.4)   |
| Tree Line*  | Shared | 104,174 ( 92,840.4)   | 63,446 ( 78,297.3)    | 46,432 (42,914.3)   |
|             | Unique | 40,719 ( 52,052.6)    | 58,750 ( 43,898.7)    | 20,543 (24,060.7)   |
| Cuernavaca* | Shared | 6,360 ( 5,626.2)      | 105,495 (106,453.1)   | 51,849 (51,624.6)   |
|             | Unique | 947 ( 1,680.8)        | 32,760 ( 31,801.9)    | 15,198 (15,422.4)   |

\*,  $P < 0.0001$  in a Chi Square test of homogeneity.

Table 4. Relationship between length of three chromosomal regions and the percent of selected protein coding genes within the regions.

| Region   | N | Intercept (SE) | Slope (SE)  | <i>F</i> | <i>P</i> | <i>R</i> <sup>2</sup> |
|----------|---|----------------|-------------|----------|----------|-----------------------|
| Proximal | 5 | -1.08 (1.11)   | 0.22 (0.11) | 4.00     | 0.14     | 0.57                  |
| Inverted | 5 | 0.77 (0.79)    | 1.55 (0.19) | 66.56    | 0.003    | 0.96                  |
| Distal   | 5 | 3.48 (0.77)    | 0.53 (0.50) | 1.11     | 0.36     | 0.27                  |

Table 5. Mean estimates of the recombination parameter *Rho* in outlier and non-outlier genes within inverted regions.

| Arr | n Outlier | Rho Outlier | n Non-Outlier | Rho Non-Outlier | <i>P</i>              |
|-----|-----------|-------------|---------------|-----------------|-----------------------|
| AR  | 20        | 0.037       | 765           | 0.047           | $2.5 \times 10^{-2}$  |
| ST  | 8         | 0.028       | 393           | 0.045           | $3.9 \times 10^{-2}$  |
| PP  | 123       | 0.041       | 1547          | 0.053           | $1.0 \times 10^{-4}$  |
| CH  | 21        | 0.025       | 673           | 0.044           | $2.0 \times 10^{-5}$  |
| TL  | 38        | 0.028       | 915           | 0.047           | $<1.0 \times 10^{-5}$ |

Arr, arrangement; P, probability of observing a greater difference between outlier and non-outlier genes.

Table 6. GO analysis for genes in arrangements with significantly high mean DAF and PSBL and at least one fixed amino acid difference.

| Term       | Function                                | Count | <i>P</i> Value | Fold Enrichment | Benjamini ( <i>q</i> ) |
|------------|-----------------------------------------|-------|----------------|-----------------|------------------------|
| GO:0016021 | Integral component of membrane          | 69    | 6.51E-06       | 1.47            | 9.77E-05               |
| GO:0050909 | Odorant binding                         | 11    | 1.09E-05       | 6.04            | 8.75E-04               |
| dpo04080   | Neuroactive ligand-receptor interaction | 6     | 3.15E-04       | 9.33            | 1.34E-03               |



## Figure Legends

- Figure 1. *Drosophila pseudoobscura* inversion cline and ages. The inversion abbreviations are AR, Arrowhead; CH, Chiricahua; CU, Cuernavaca; HY, Hypothetical; PP, Pikes Peak; SC, Santa Cruz; ST, Standard; and TL, Tree Line. (Left) Gene arrangement cline in *D. pseudoobscura* across the southwestern United States. The six regions delineated on the map are different climatic zones or niches inferred in Schaeffer (2008) with pie charts indicating the frequencies of the major arrangements found in each zone from 1940 inversion samples (Dobzhansky, 1944). (Right) Ages of the inversions estimated from 18 nucleotide markers sampled from the third chromosome (A. G. Wallace et al., 2011). Dmir is the outgroup *D. miranda*. The Hypothetical arrangement is the common ancestor of all arrangements within *D. pseudoobscura*. The CU arrangement is connected to the SC arrangement via a dotted line because CU is derived from SC, but was not sampled in the Wallace et al. (2011) study.
- Figure 2. Phylogenetic network of the *Drosophila pseudoobscura* third chromosome gene arrangements inferred from polytene chromosomes isolated from larval salivary glands (Dobzhansky, 1944; Dobzhansky & Sturtevant, 1938). The box on the left shows the phylogenetic network of the different gene arrangements. The hypothetical arrangement is the ancestral arrangement (A. G. Wallace et al., 2011) and the arrows indicate the derivation of each arrangement from its ancestor. The strains with the circled arrangements were sequenced in this study. The chromosomes depicted to the right represent the numbered sections on the cytological map of *D. pseudoobscura* (Schaeffer et al., 2008). Beginning with the Hypothetical arrangement, the colored brackets indicate the segment of the ancestral arrangement that inverted and the corresponding segment is indicated with the same colored bar in the derived arrangement. These colors also match the arrows in the network in the box on the right. The colored sections under the maps indicate syntenic regions that are conserved among all gene arrangements.
- Figure 3. Phylogeny inferred with the neighbor-joining method (Saitou & Nei, 1987). A total of 1,028,037 SNPs were used in each of the regions to construct the gene arrangement phylogeny. A total of 500 bootstrap replicated were used to determine the confidence in the nodes of the trees where only nodes with > 90% support shown on the tree.
- Figure 4. Top Row: Phylogenies inferred with the neighbor-joining method (Saitou & Nei, 1987). Phylogenies were inferred in each of 14 syntenic blocks defined by seven pairs of inversion breakpoints. Below each phylogeny is a colored block with a label that corresponds to the 14 syntenic blocks on the cytogenetic map shown at the bottom. Indels were removed from the analysis. The following numbers of SNPs were used in each of the regions to construct the phylogenies: 63A-64B, 36,372 SNPs; 64C-65B, 24,361 SNPs; 65C-68B, 239,432 SNPs; 68C-69C, 77,386 SNPs; 69D-70A, 57,145 SNPs; 76B, 16,556 SNPs; 76A-74C, 91,893 SNPs; 74B-70D, 203,463 SNPs; 70C-70B, 59,084 SNPs; 76C-78A, 51,476 SNPs; 78B-79A, 75,395 SNPs; 79B, 18,542 SNPs; 79C-79D, 9,324 SNPs; and 80A-81D, 67,608 SNPs. A total of 500 bootstrap replicated were used to determine the confidence in the nodes of the trees where only nodes with > 90% support shown on the tree. Middle Row: The 14 matrices indicate whether a particular region is outside (open box) or within (filled box) the inverted region in a heterozygote for a particular pair of arrangements (shown on the horizontal and vertical axis). The fill colors match the colors for the syntenic blocks of the reference sequence. Bottom Row: A

diagram of the cytogenetic map of the Arrowhead reference genome with colored segments representing the 14 syntenic blocks.

- Figure 5. Estimates of Tajima's  $D/|D_{\min}|$  estimated from unique mutations in 2,669 gene regions across the third chromosome (Muller C) of *D. pseudoobscura* in five gene arrangements, Arrowhead, Standard, Pikes Peak, Chiricahua, and Tree Line. Outlier gene regions that showed a significant negative or positive value of Tajima's  $D/|D_{\min}|$  are indicated with a red point. Gene regions that did not have an extreme value of Tajima's  $D/|D_{\min}|$  are shown with a gray dot. The order of genes is specific to the particular gene arrangement background. The locations of inversion breakpoints are shown with a dotted line. Box plots for all  $D/|D_{\min}|$  values across the third chromosome are shown in the lower right hand corner for each of the arrangements (Hintze & Nelson, 1998).
- Figure 6. Estimates of the mean derived allele frequency (DAF) per segregating site estimated from unique mutations in the five gene arrangements, Arrowhead, Standard, Pikes Peak, Chiricahua, and Tree Line. Regions that showed a significantly large mean given the number of SNPs are indicated with a red point. Gene regions that did not have an extreme mean DAF value are shown with a gray dot. The locations of inversion breakpoints are shown with a solid or dotted line. The order of genes is specific to the particular gene arrangement background. Box plots for all mean DAF values across the third chromosome are shown in the lower right hand corner for each of the arrangements (Hintze & Nelson, 1998).
- Figure 7. Population specific branch lengths estimated for five of the six arrangements. The plots to the left show the estimates of PSBL for the 2,669 genes across the third chromosome. Each gene is represented by a point, with those colored in red classified as statistical outliers after correcting for multiple testing. The histograms to the right show the distribution of PSBL for each arrangement with the branch highlighted in red.
- Figure 8. Estimates of the recombination parameter  $\rho$  within 2,669 gene regions across the third chromosome. Regions that showed a significantly large mean DAF or PSBL given the number of SNPs are indicated with a red circle. Regions that did not have an extreme mean DAF value are shown with a gray dot. The locations of inversion breakpoints are shown with a solid or dotted line. The order of genes is specific to the particular gene arrangement background.
- Figure 9. Triangular heat map showing the significance of linkage disequilibrium (LD) for all polymorphic sites on the third chromosome using the correlation-based procedure of Zaykin et al. (2008). Each point is calculated as the average of 100 adjacent sites. Red indicates greater LD and blue represent associations that are not significant. The top bars depict the results of a Fisher's Exact Test for significant associations of alleles with a particular arrangement. The colors represent the proportions of significant tests ( $p < 1 \times 10^{-6}$ ) in blocks of 100 sites.

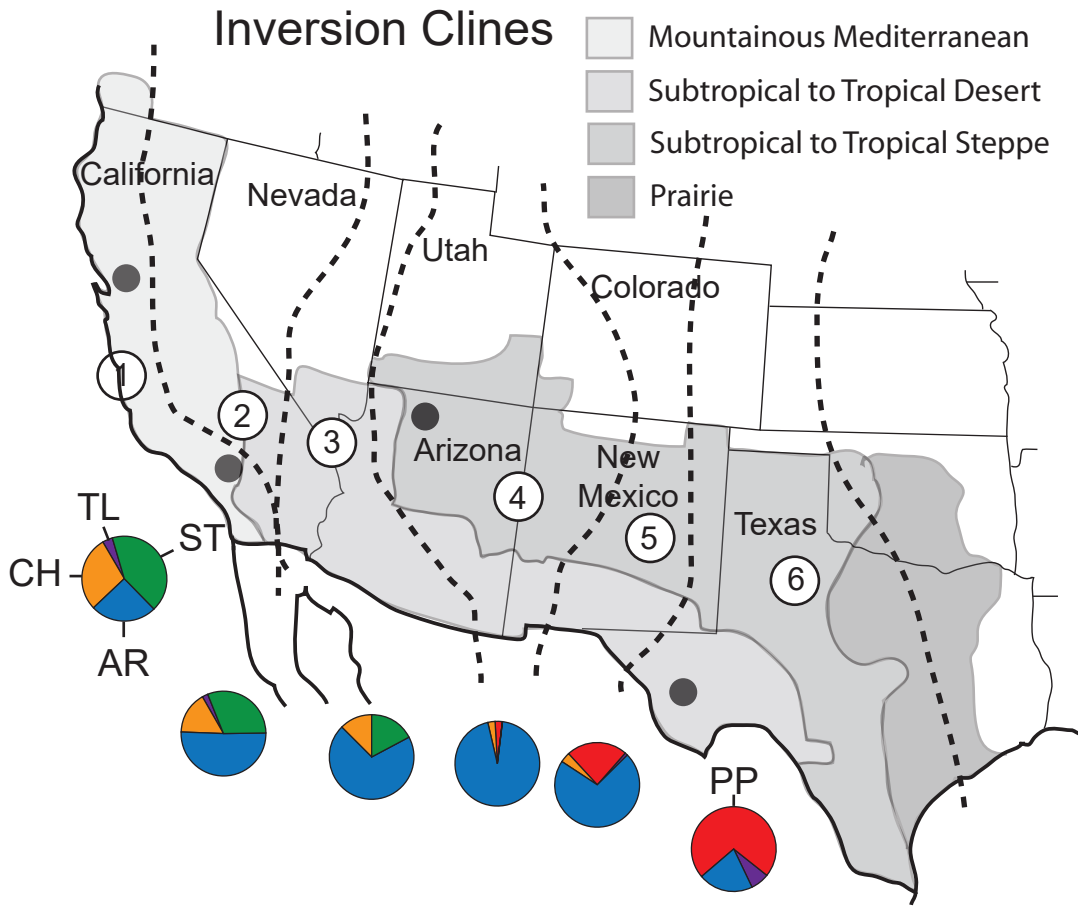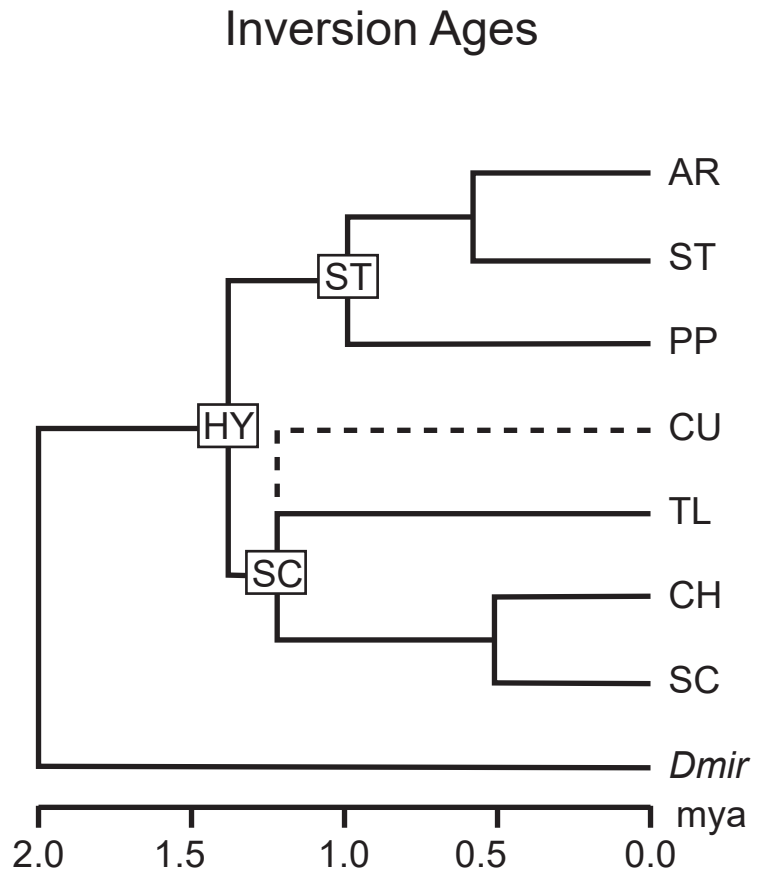

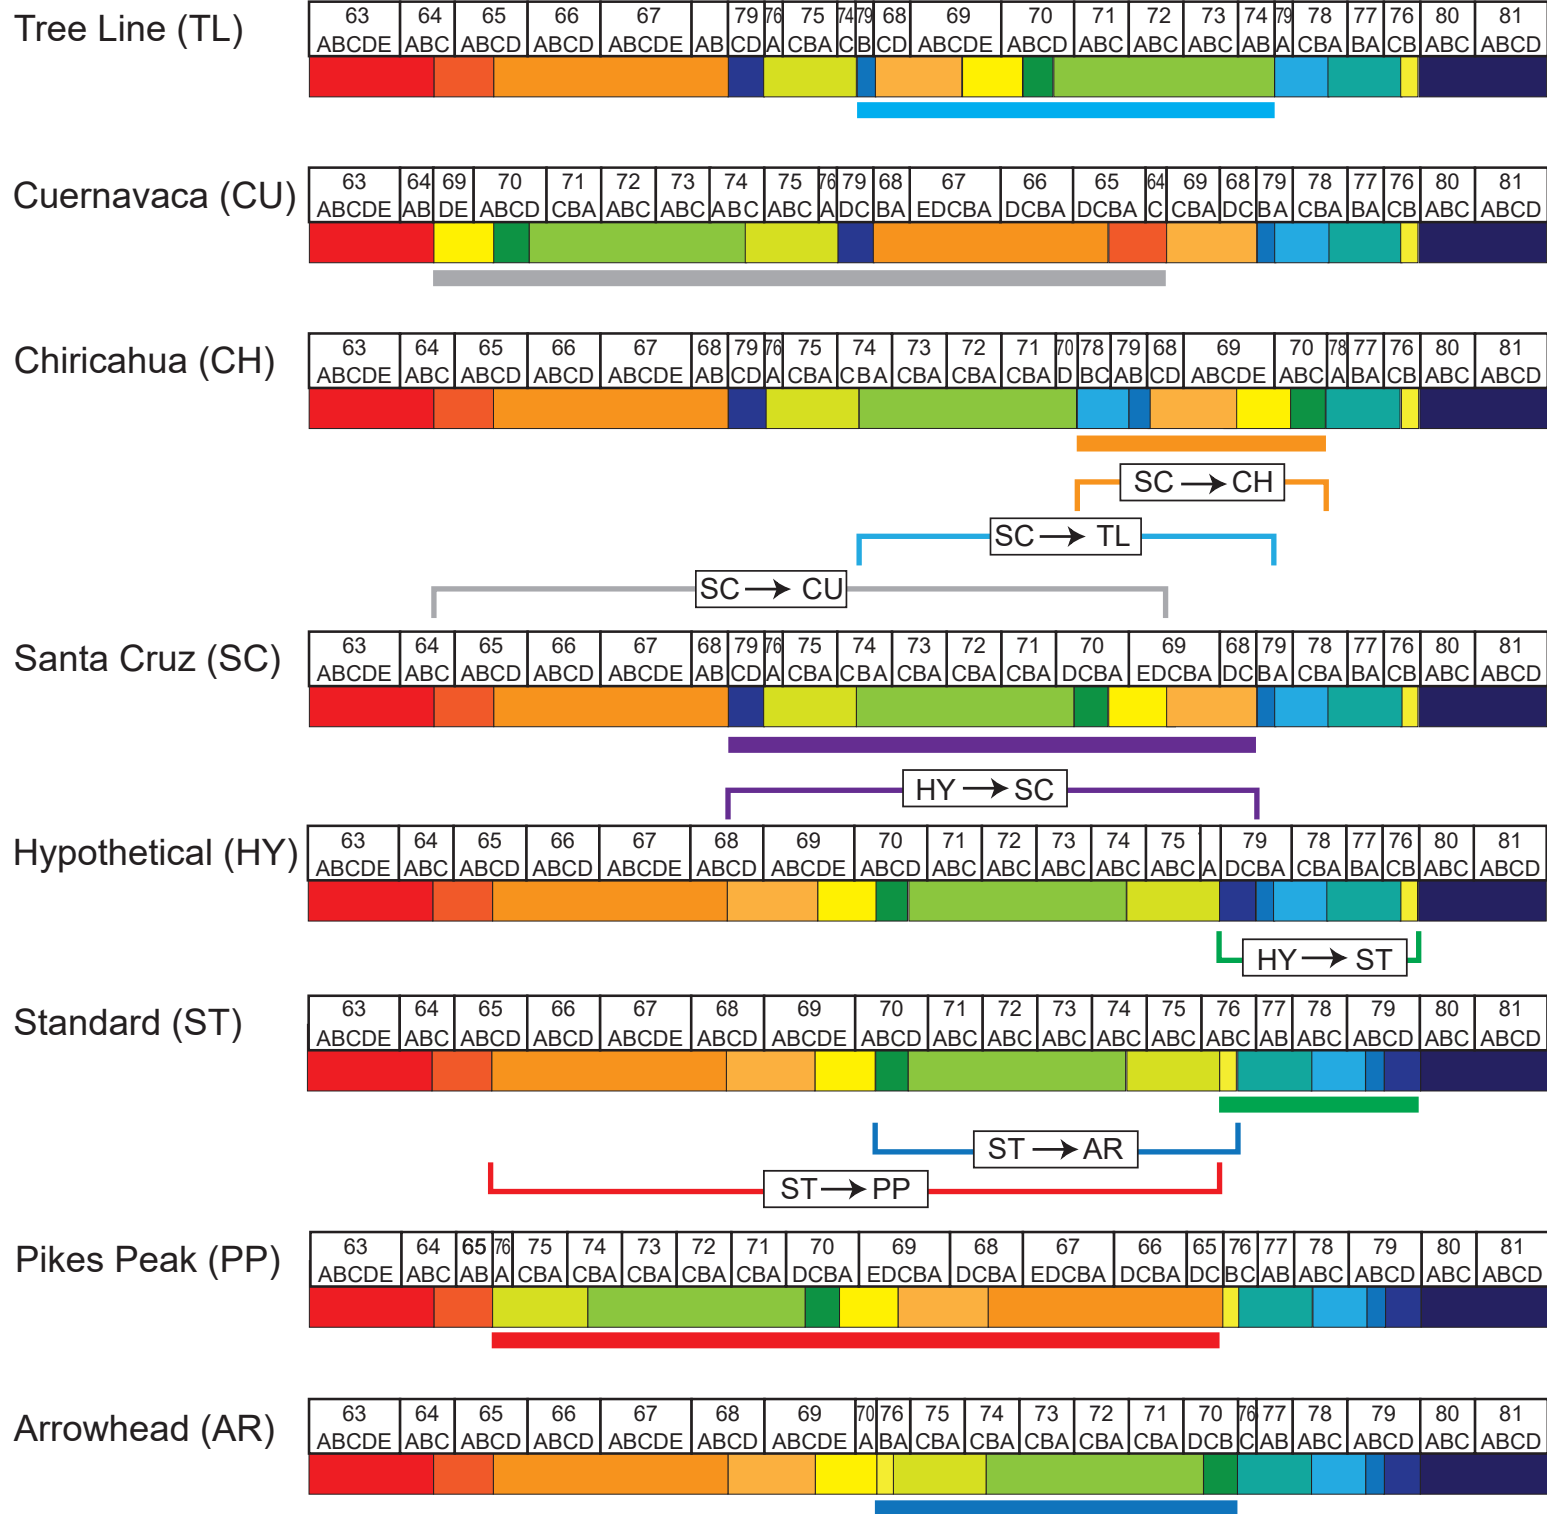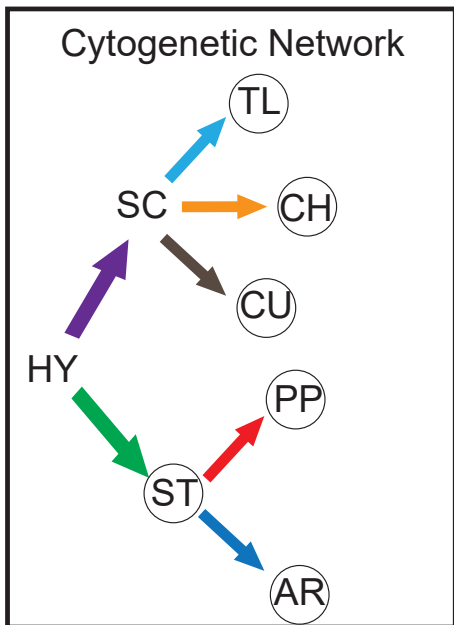

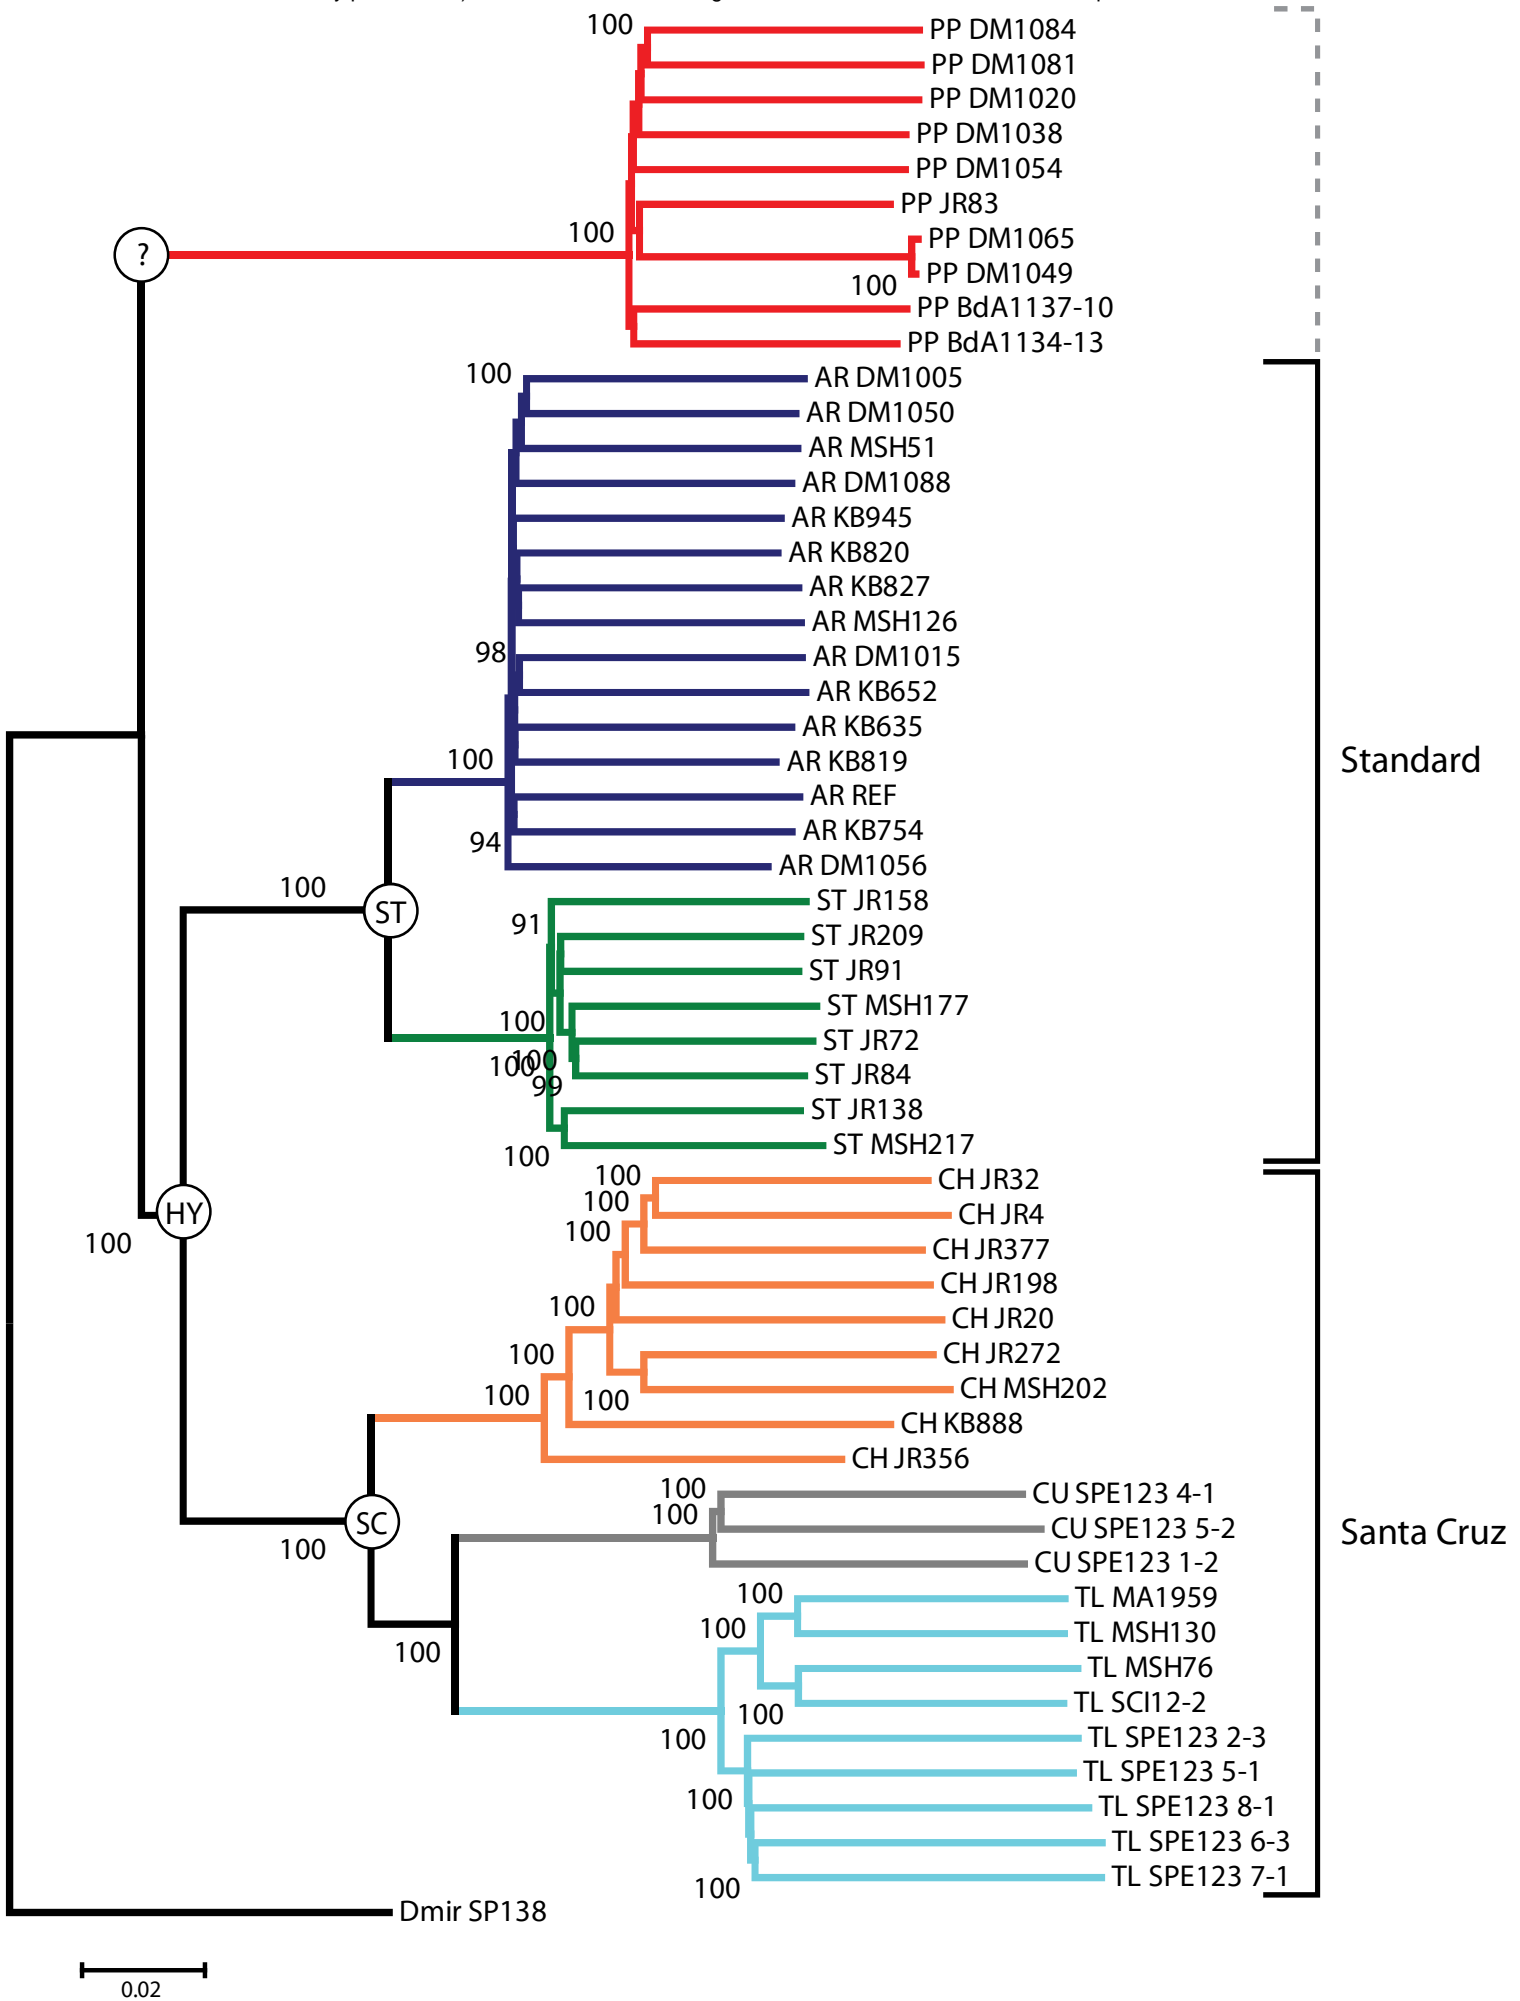

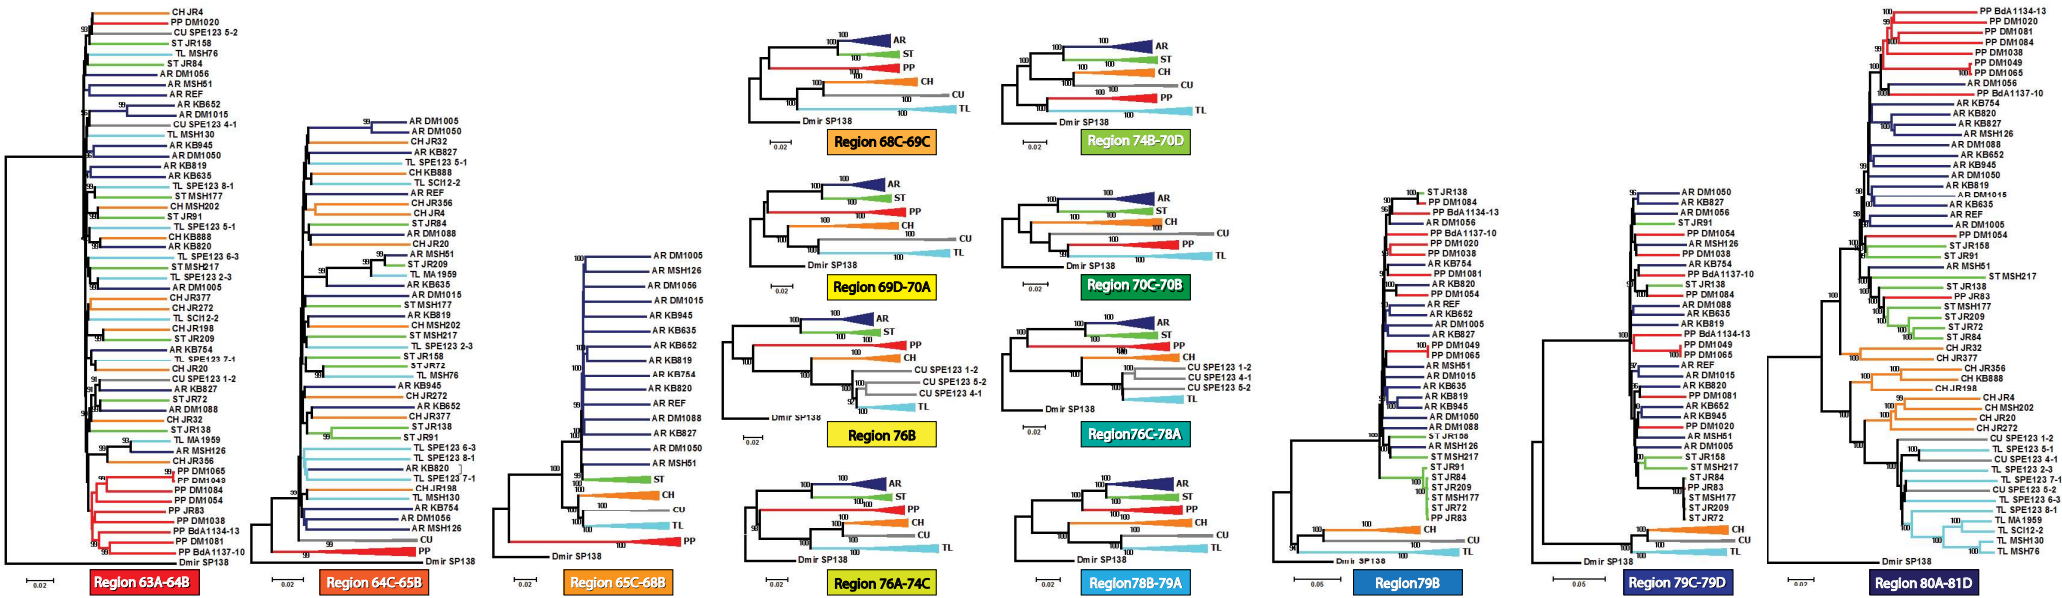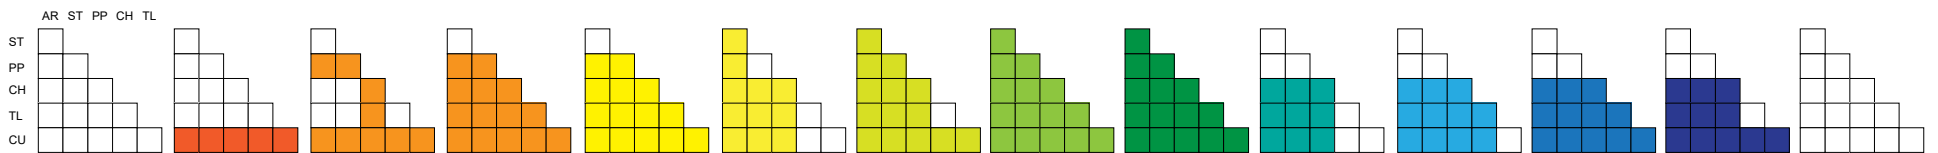

| Region         | 63    | 64  | 65   | 66   | 67    | 68   | 69    | 70 | 71 | 72  | 73  | 74  | 75  | 76  | 77  | 78  | 79  | 80   | 81  |      |
|----------------|-------|-----|------|------|-------|------|-------|----|----|-----|-----|-----|-----|-----|-----|-----|-----|------|-----|------|
| Arrowhead (AR) | ABCDE | ABC | ABCD | ABCD | ABCDE | ABCD | ABCDE | A  | BA | CBA | CBA | CBA | CBA | CBA | DCB | CAB | ABC | ABCD | ABC | ABCD |

Centromere

Arrowhead (AR)

Telomere

### Arrowhead

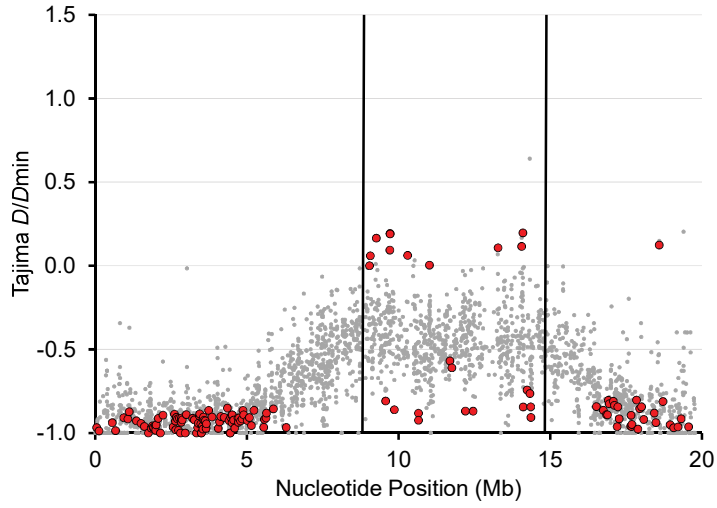

### Chiricahua

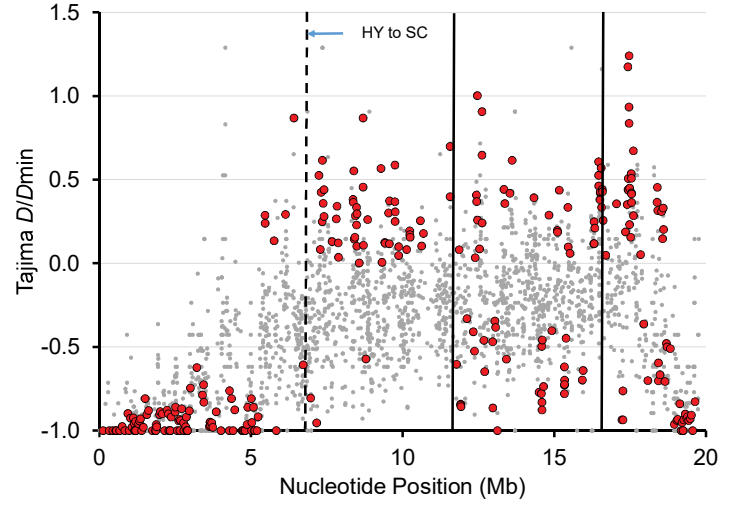

### Standard

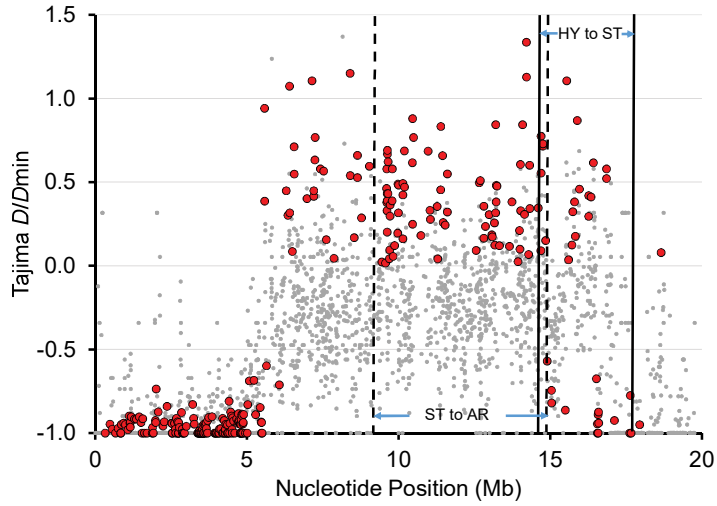

### Tree Line

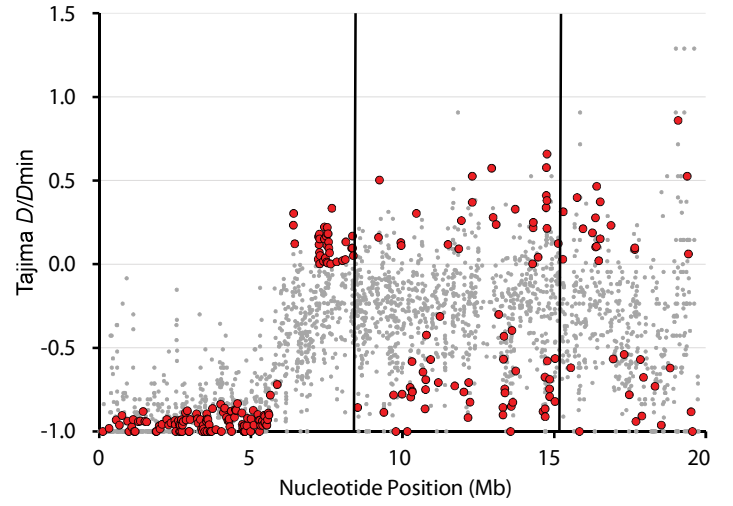

### Pikes Peak

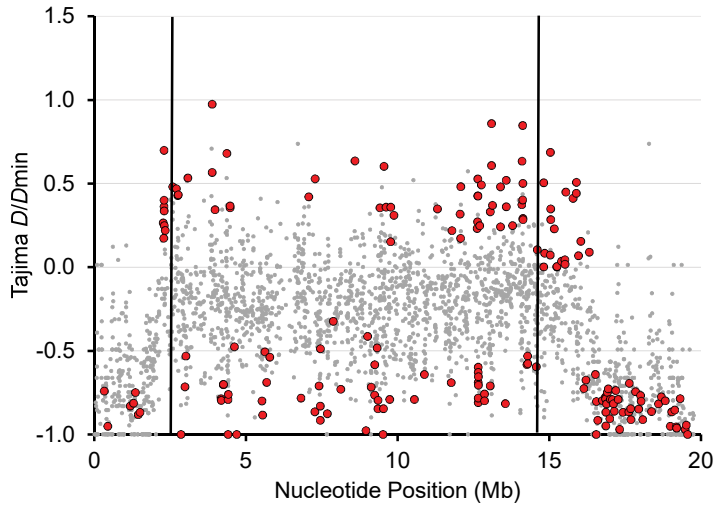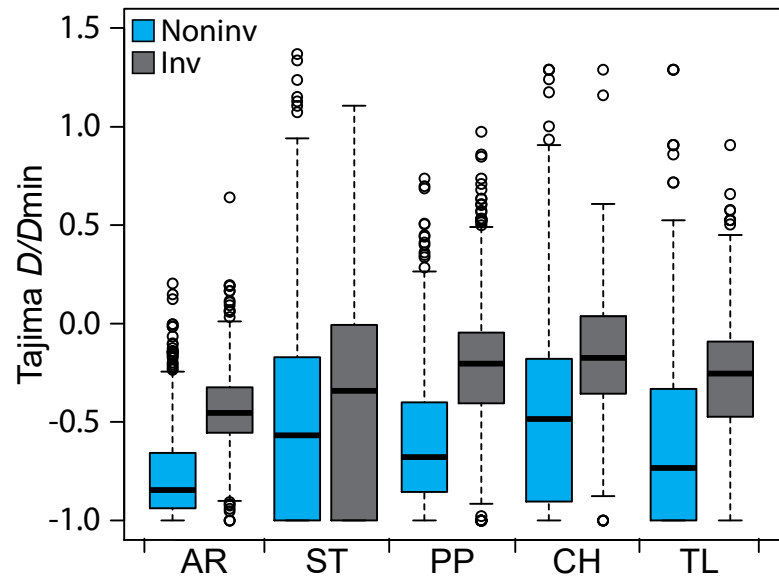

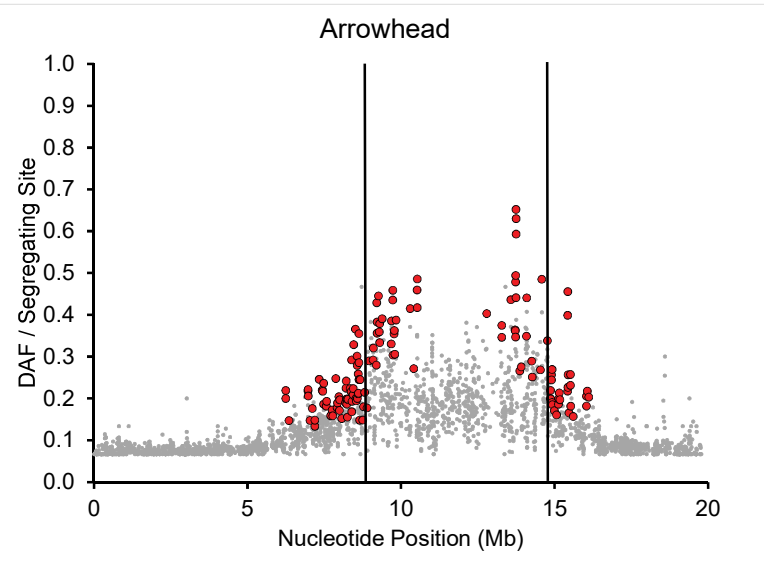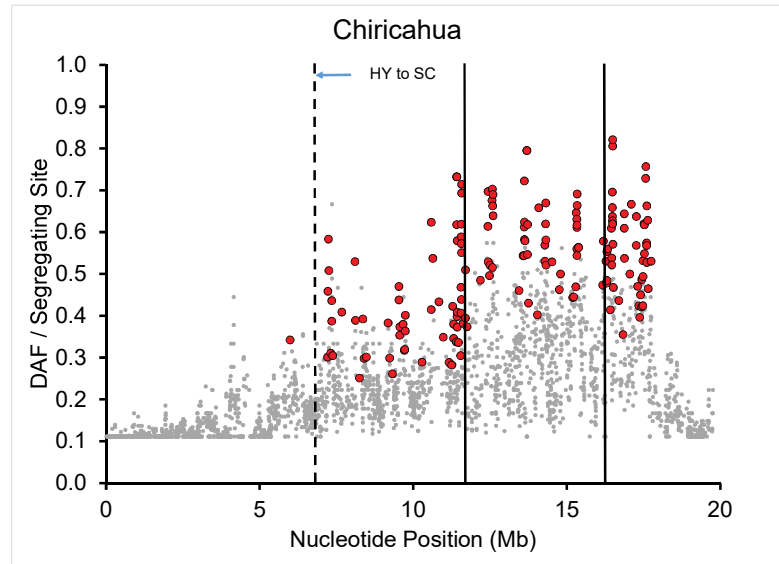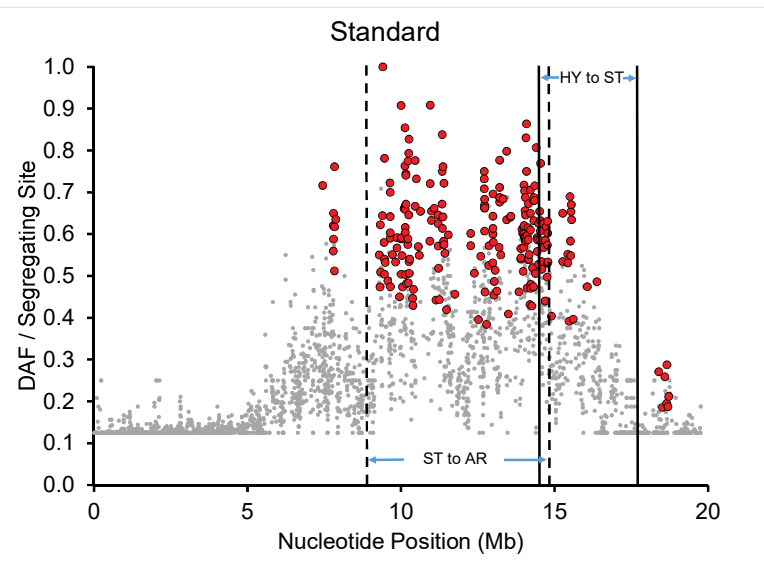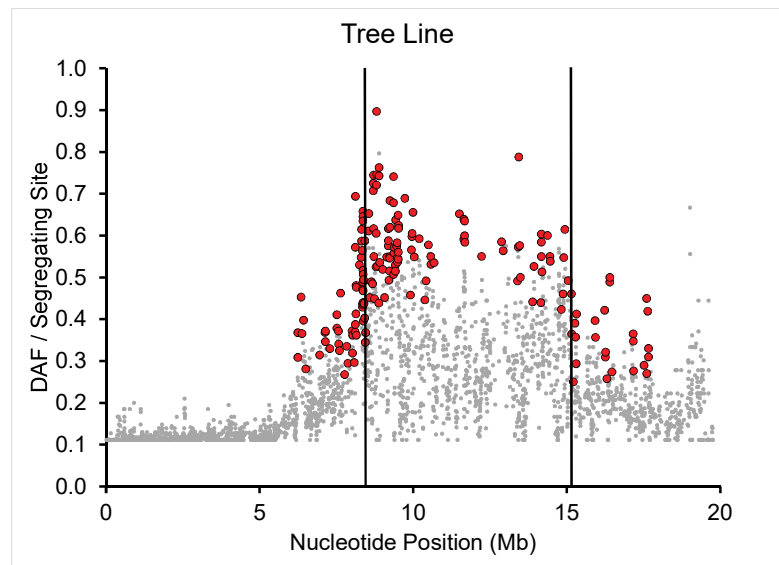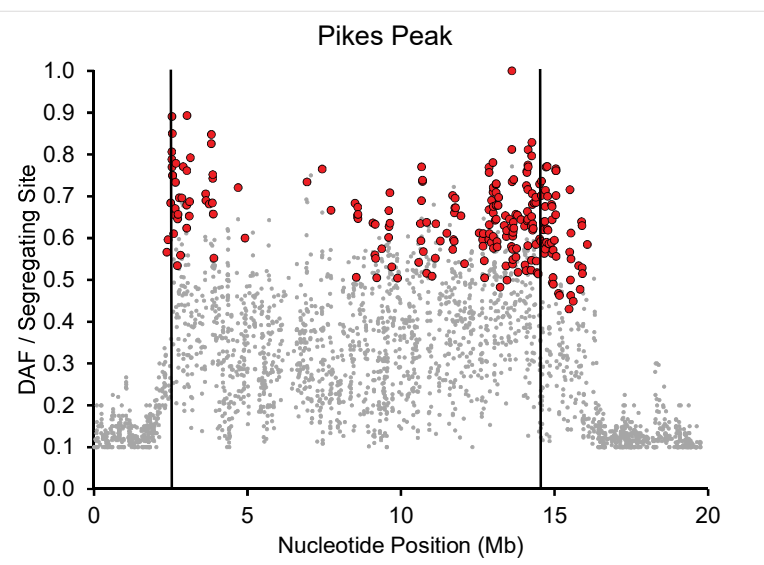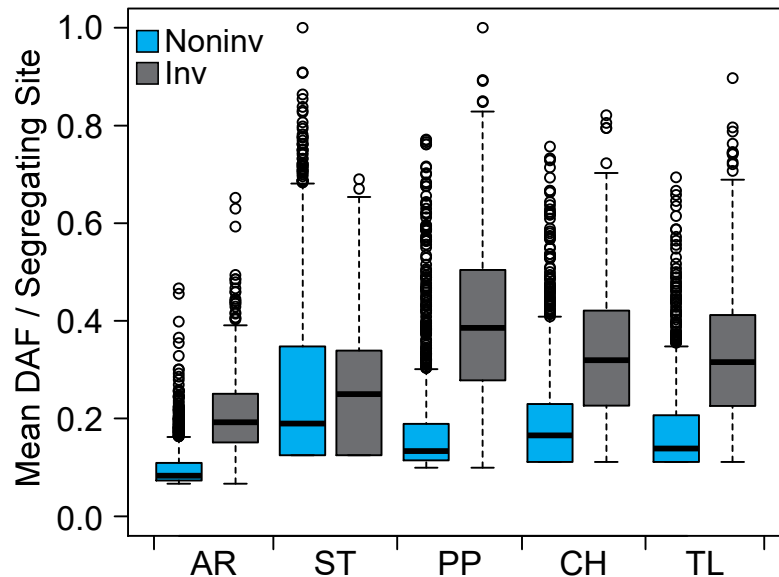



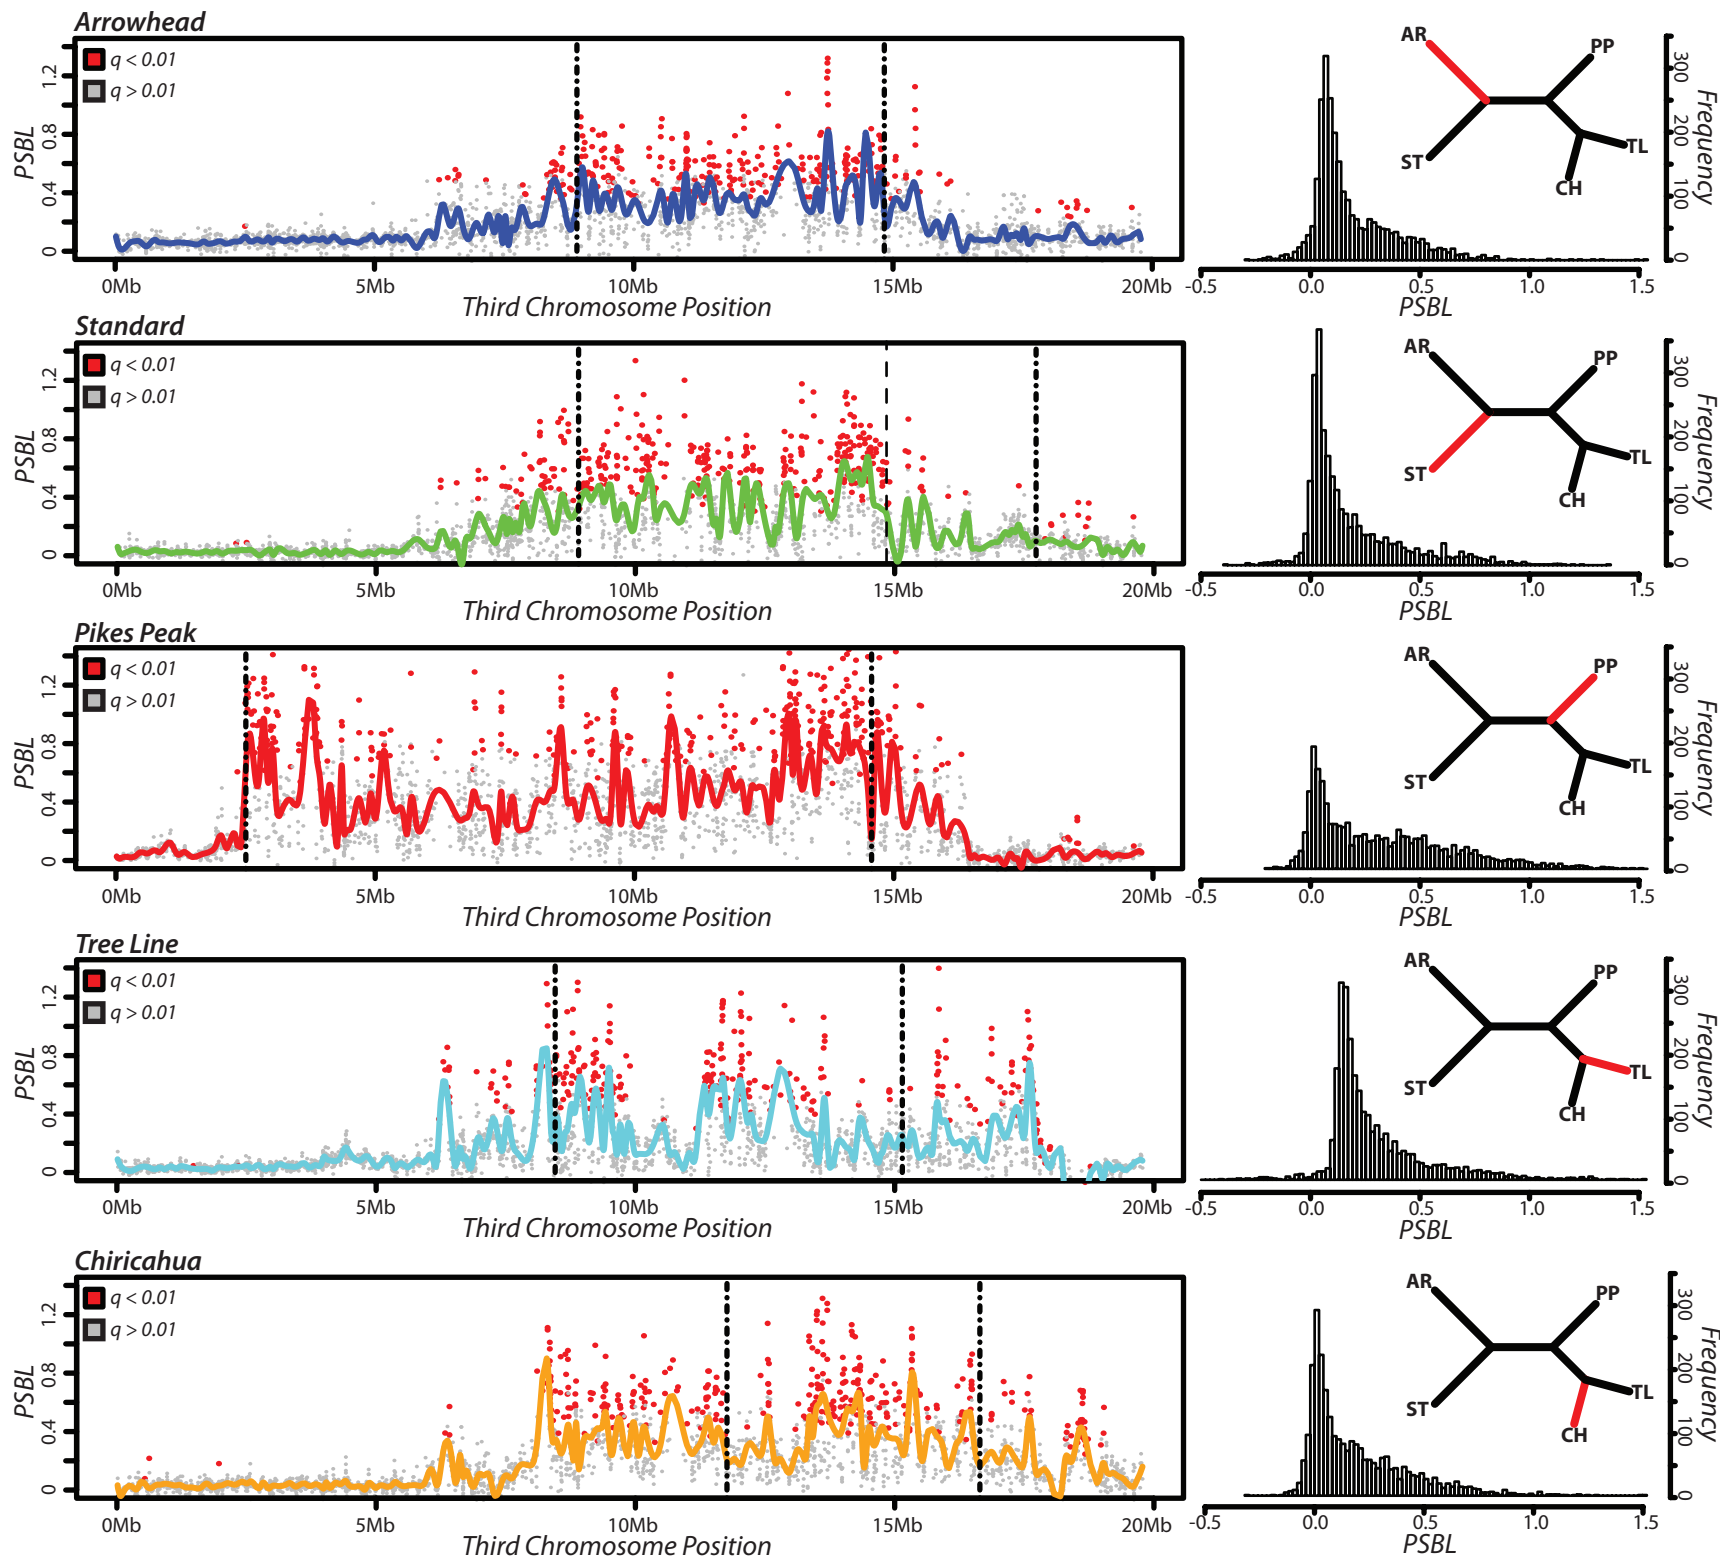

### Arrowhead

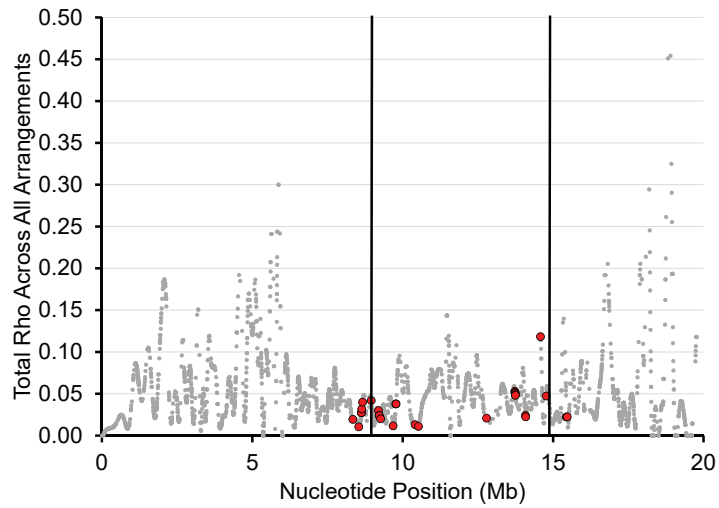

### Chiricahua

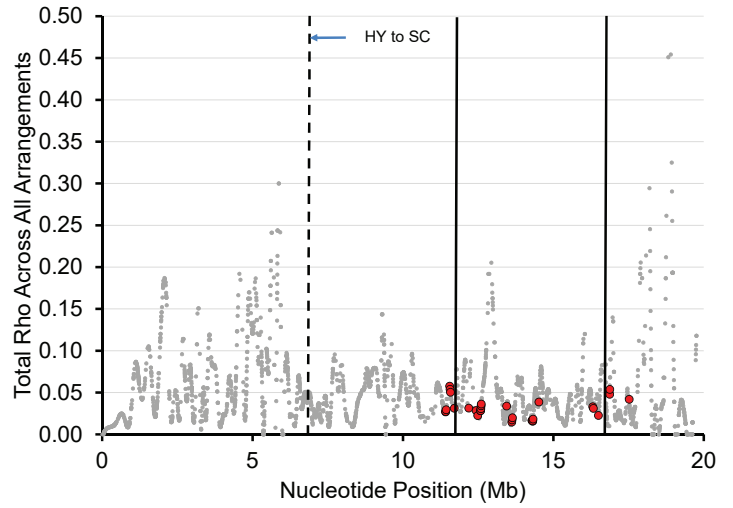

### Standard

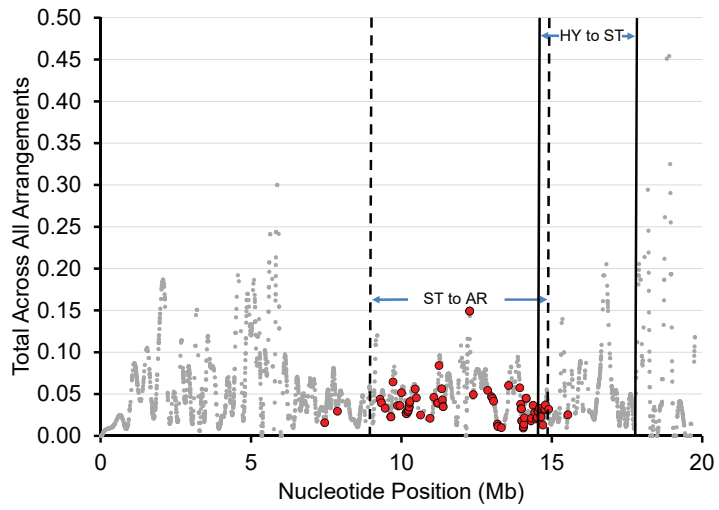

### Tree Line

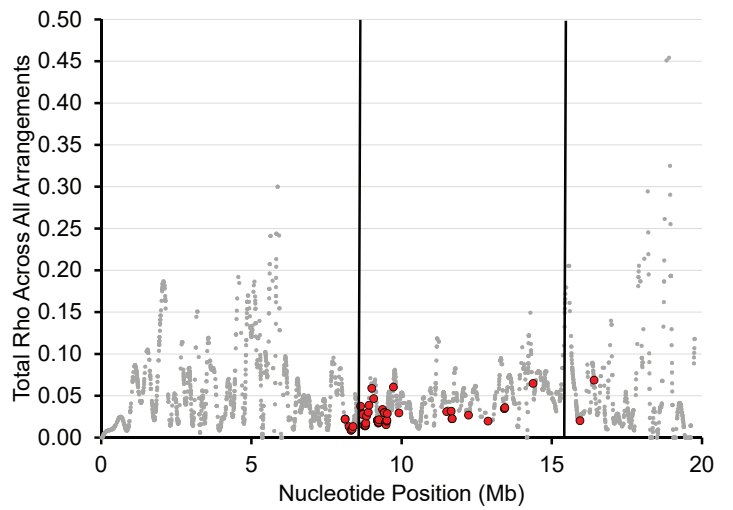

### Pikes Peak

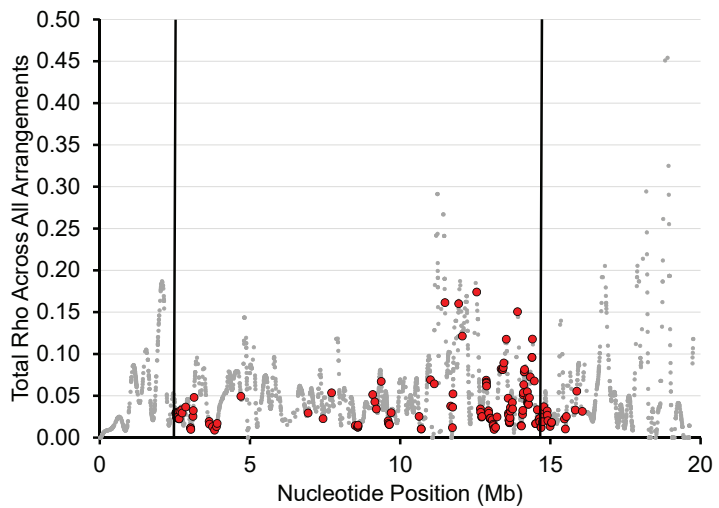

Fraction of Significant Sites for Fisher's Exact Test

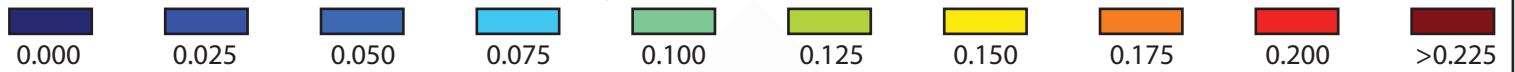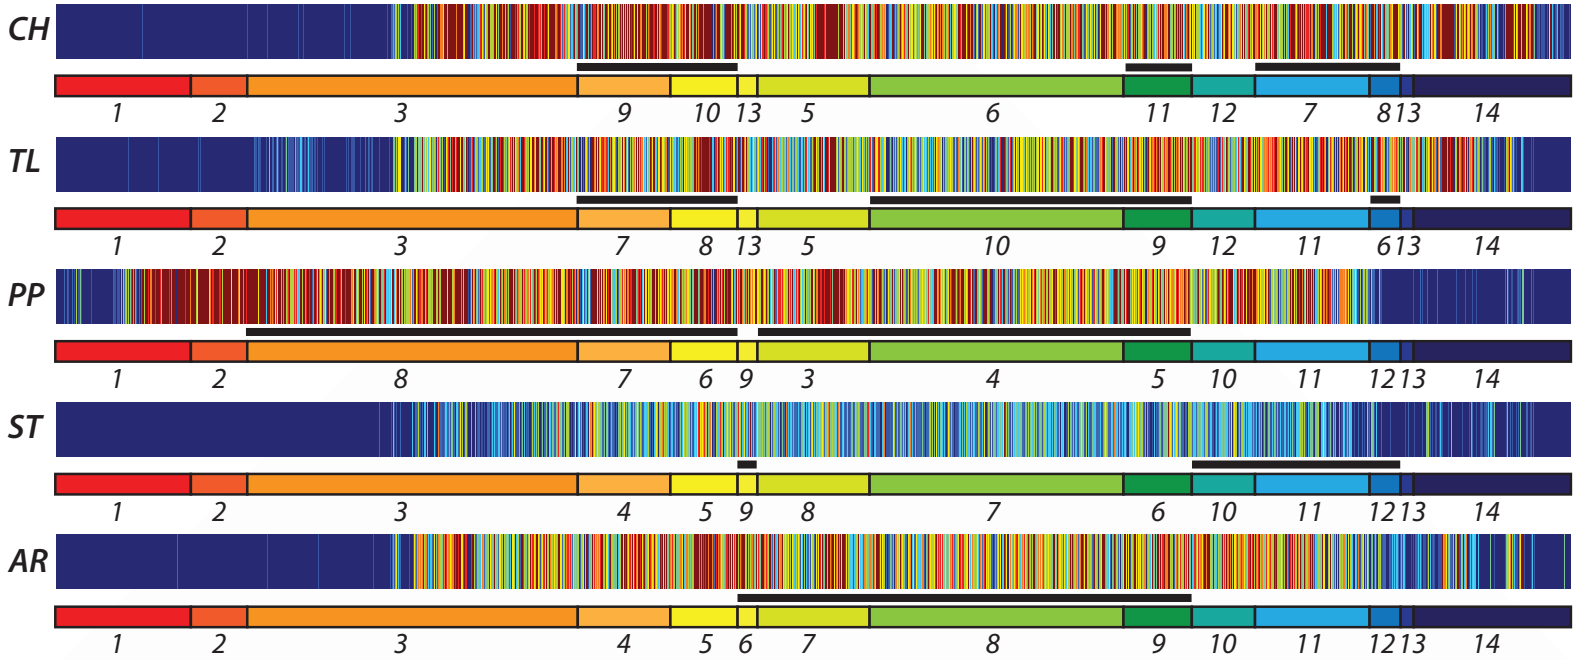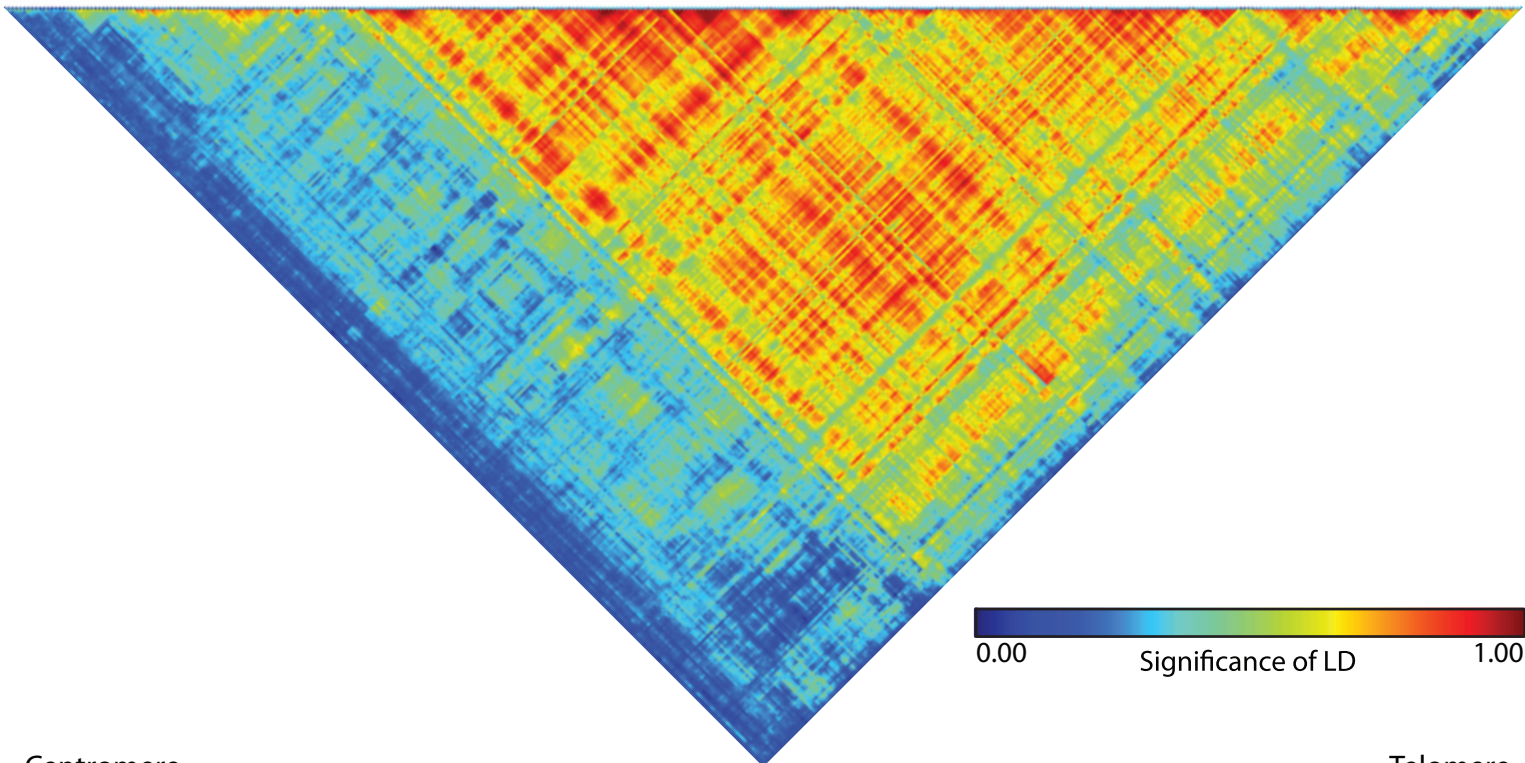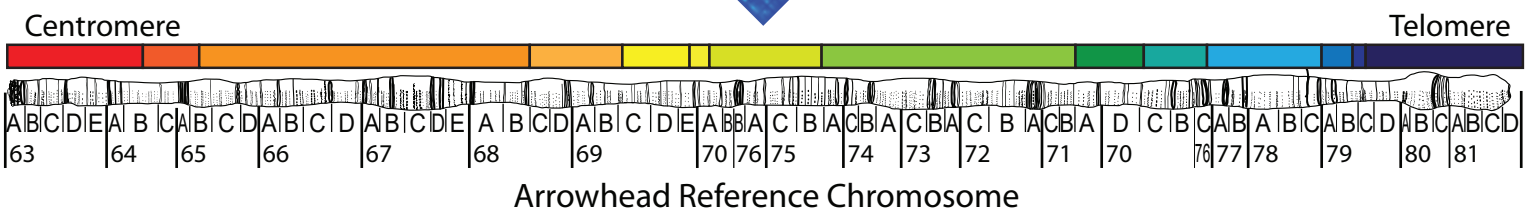

Source: https://www.biorxiv.org/content/biorxiv/early/2017/08/17/177204.full.pdf
